# Supplementary material for: Queensland Alcohol-related violence and Night Time Economy Monitoring project (QUANTEM): a study protocol
Source: PubMed Central journal article supplement (PMC5629755; doi:10.1186/s12889-017-4811-9), 2017-10-05
Supplement: 12889_2017_4811_MOESM1_ESM.pdf [file 12889_2017_4811_MOESM1_ESM.pdf]

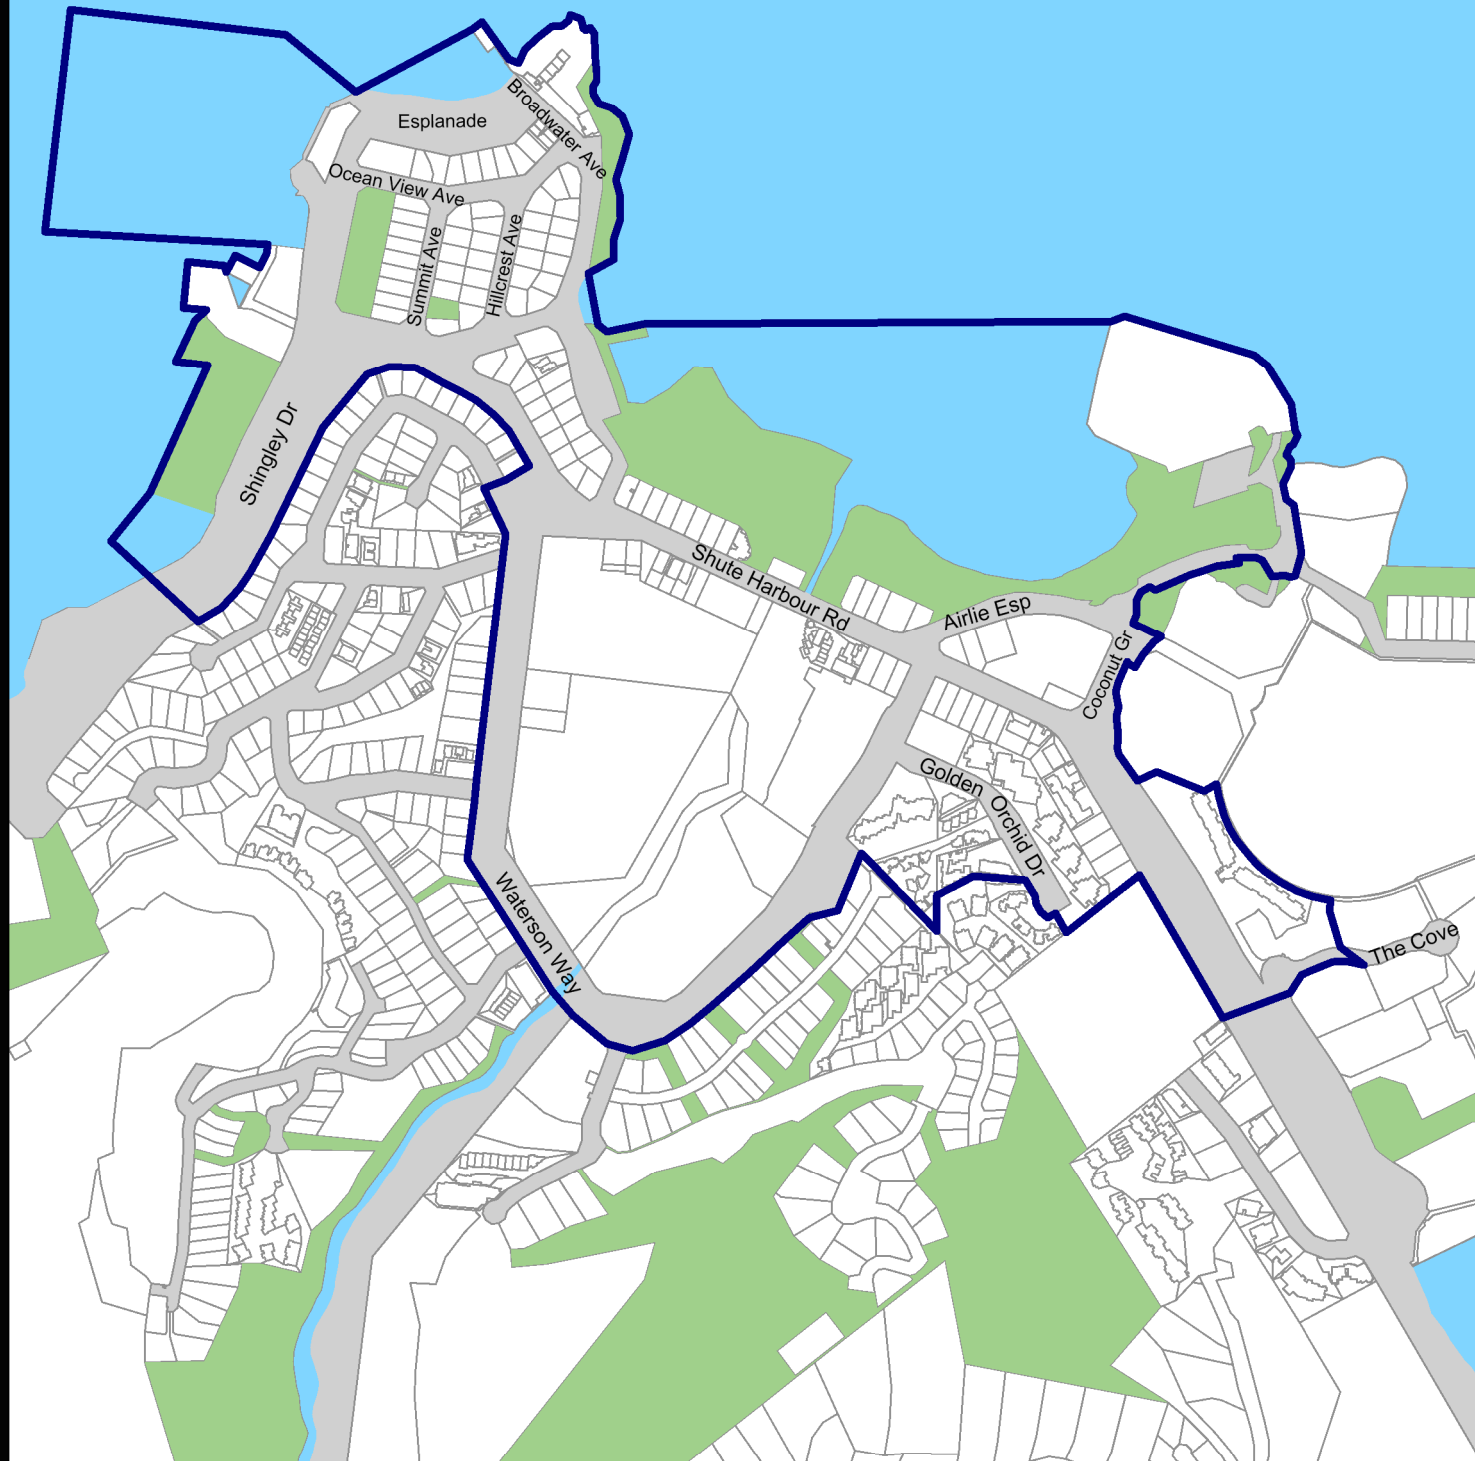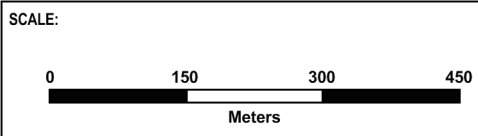

Scale: 1:8,290

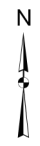

- LEGEND:
-  Boundary of safe night precinct
  -  Waterway
  -  Parks and reserves
  -  Property boundaries
  -  Road casements

## AIRLIE BEACH CBD

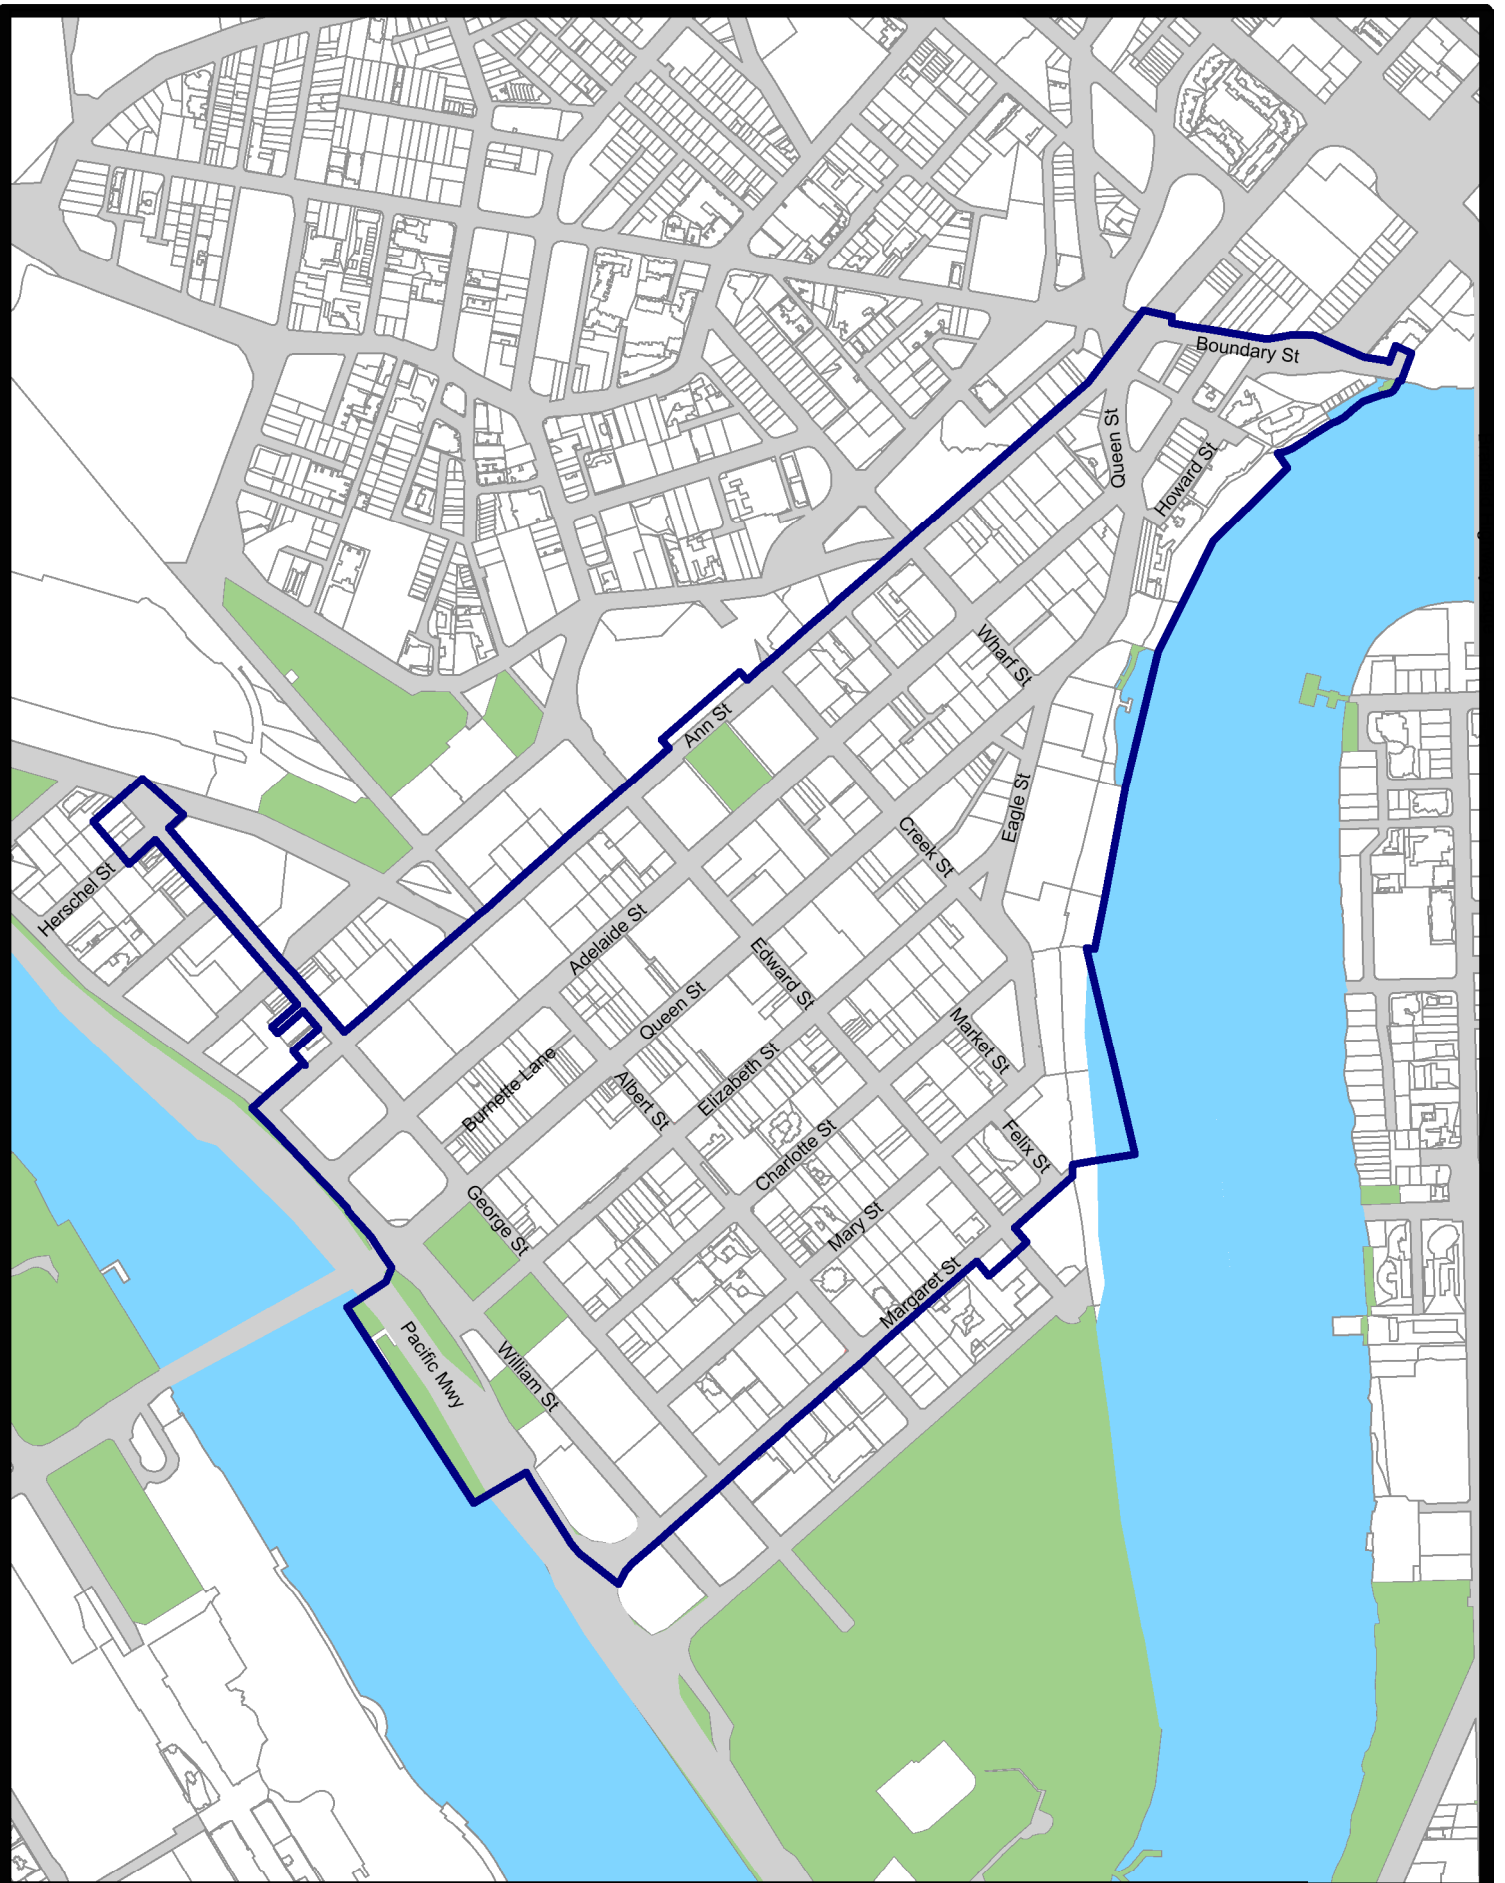

SCALE:

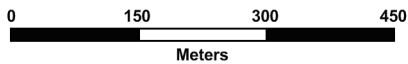

Scale: 1:8,870

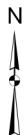

LEGEND:

-  Boundary of safe night precinct
-  Waterway
-  Parks and reserves
-  Property boundaries
-  Road casements

## BRISBANE CBD

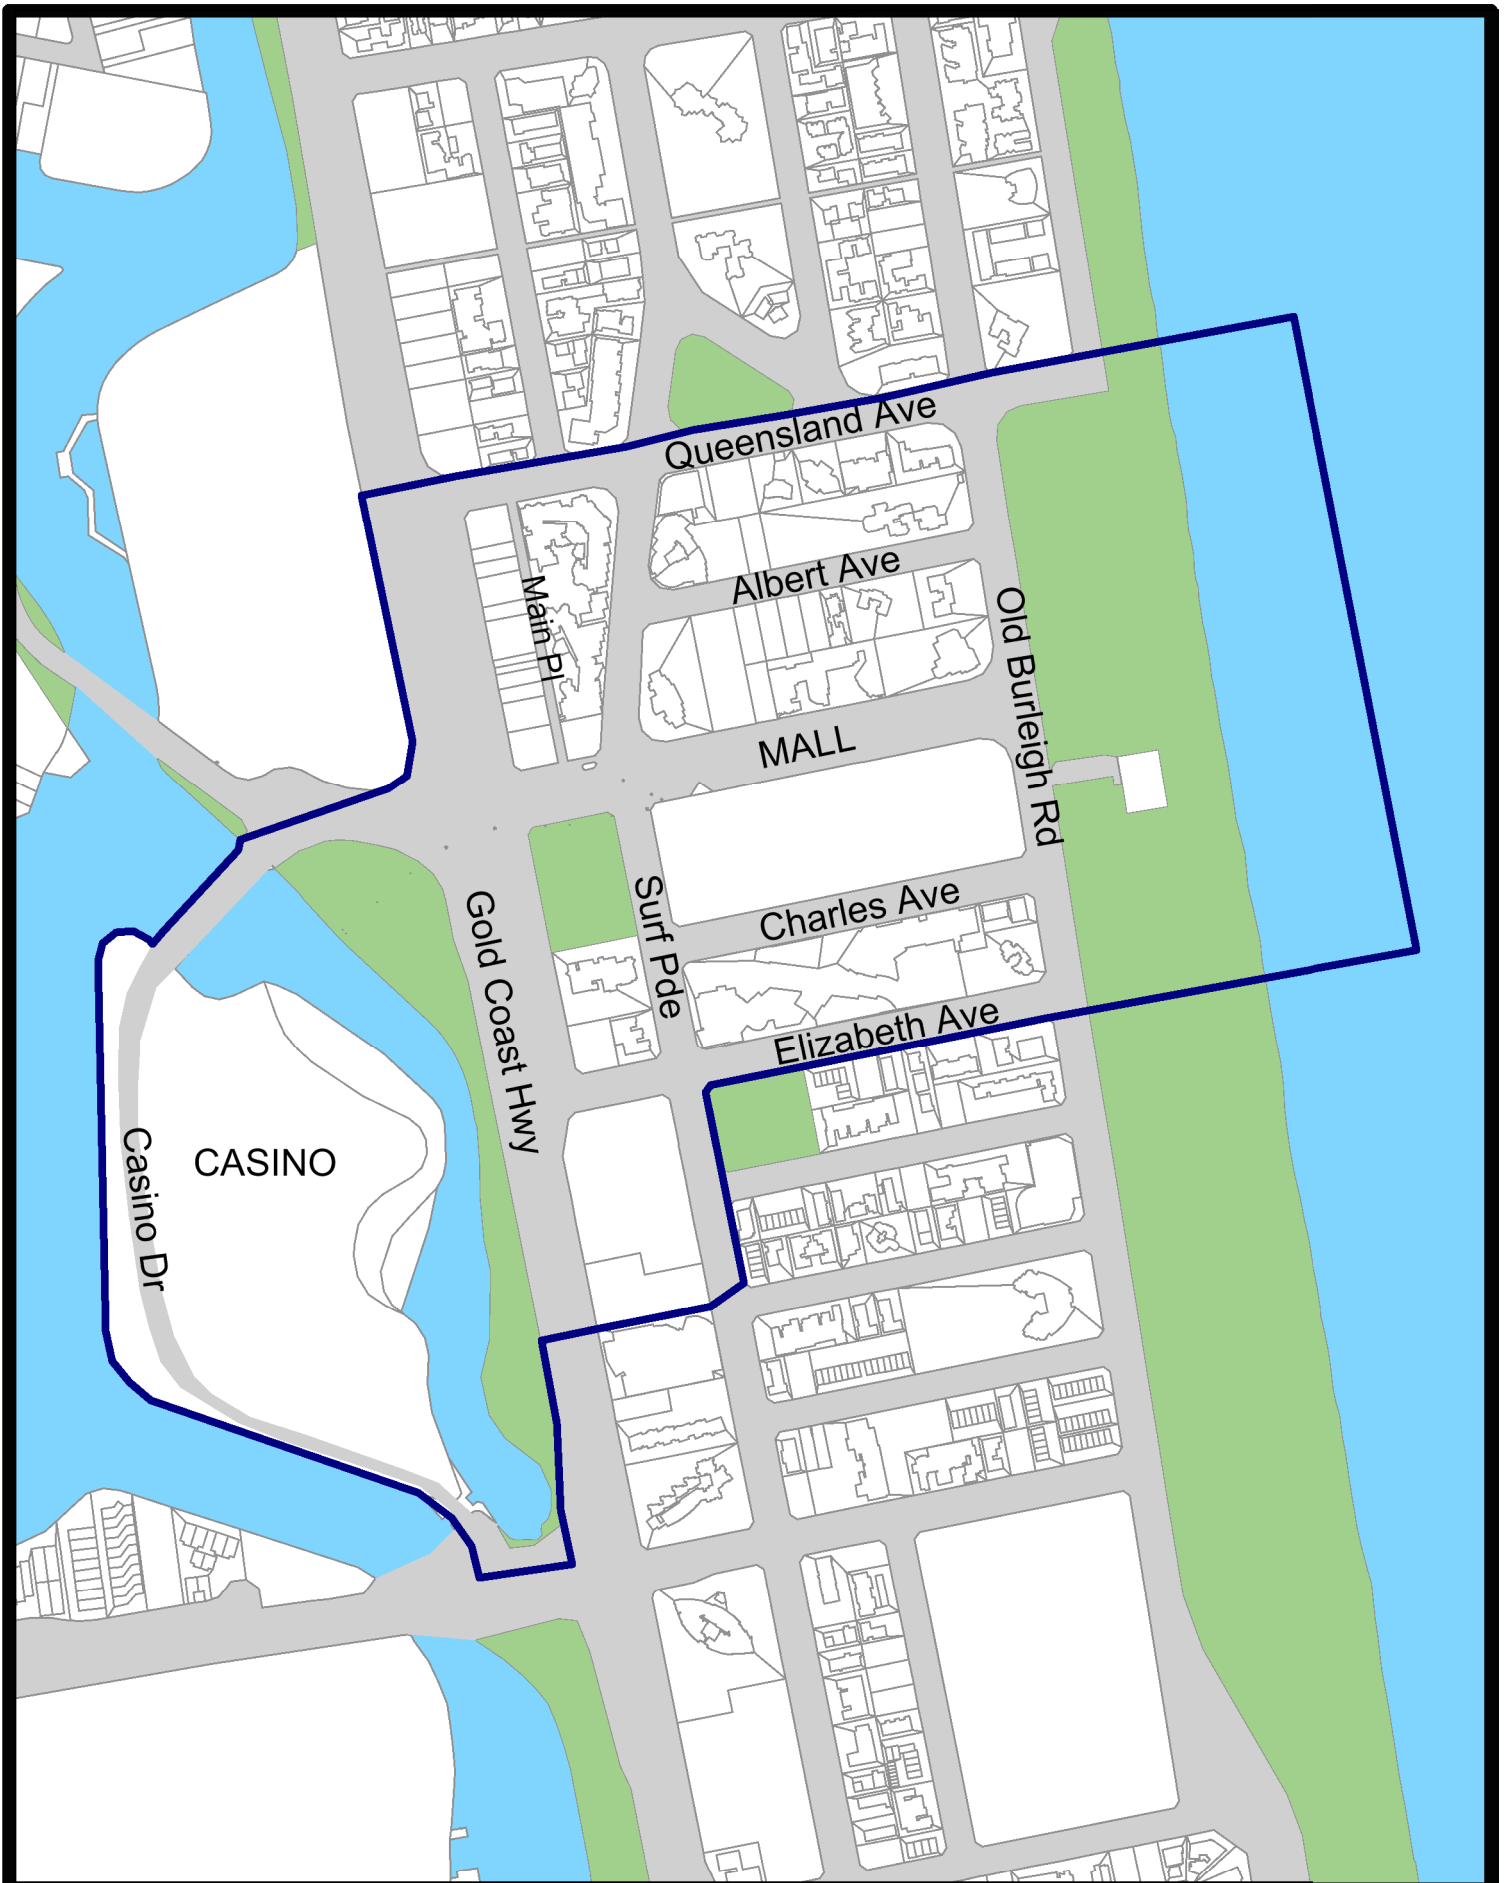

SCALE:

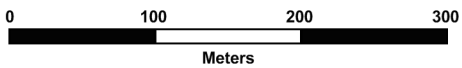

Scale: 1:5,180



LEGEND:

- Boundary of safe night precinct
- Waterway
- Parks and reserves
- Property boundaries
- Road casements

**BROADBEACH CBD**

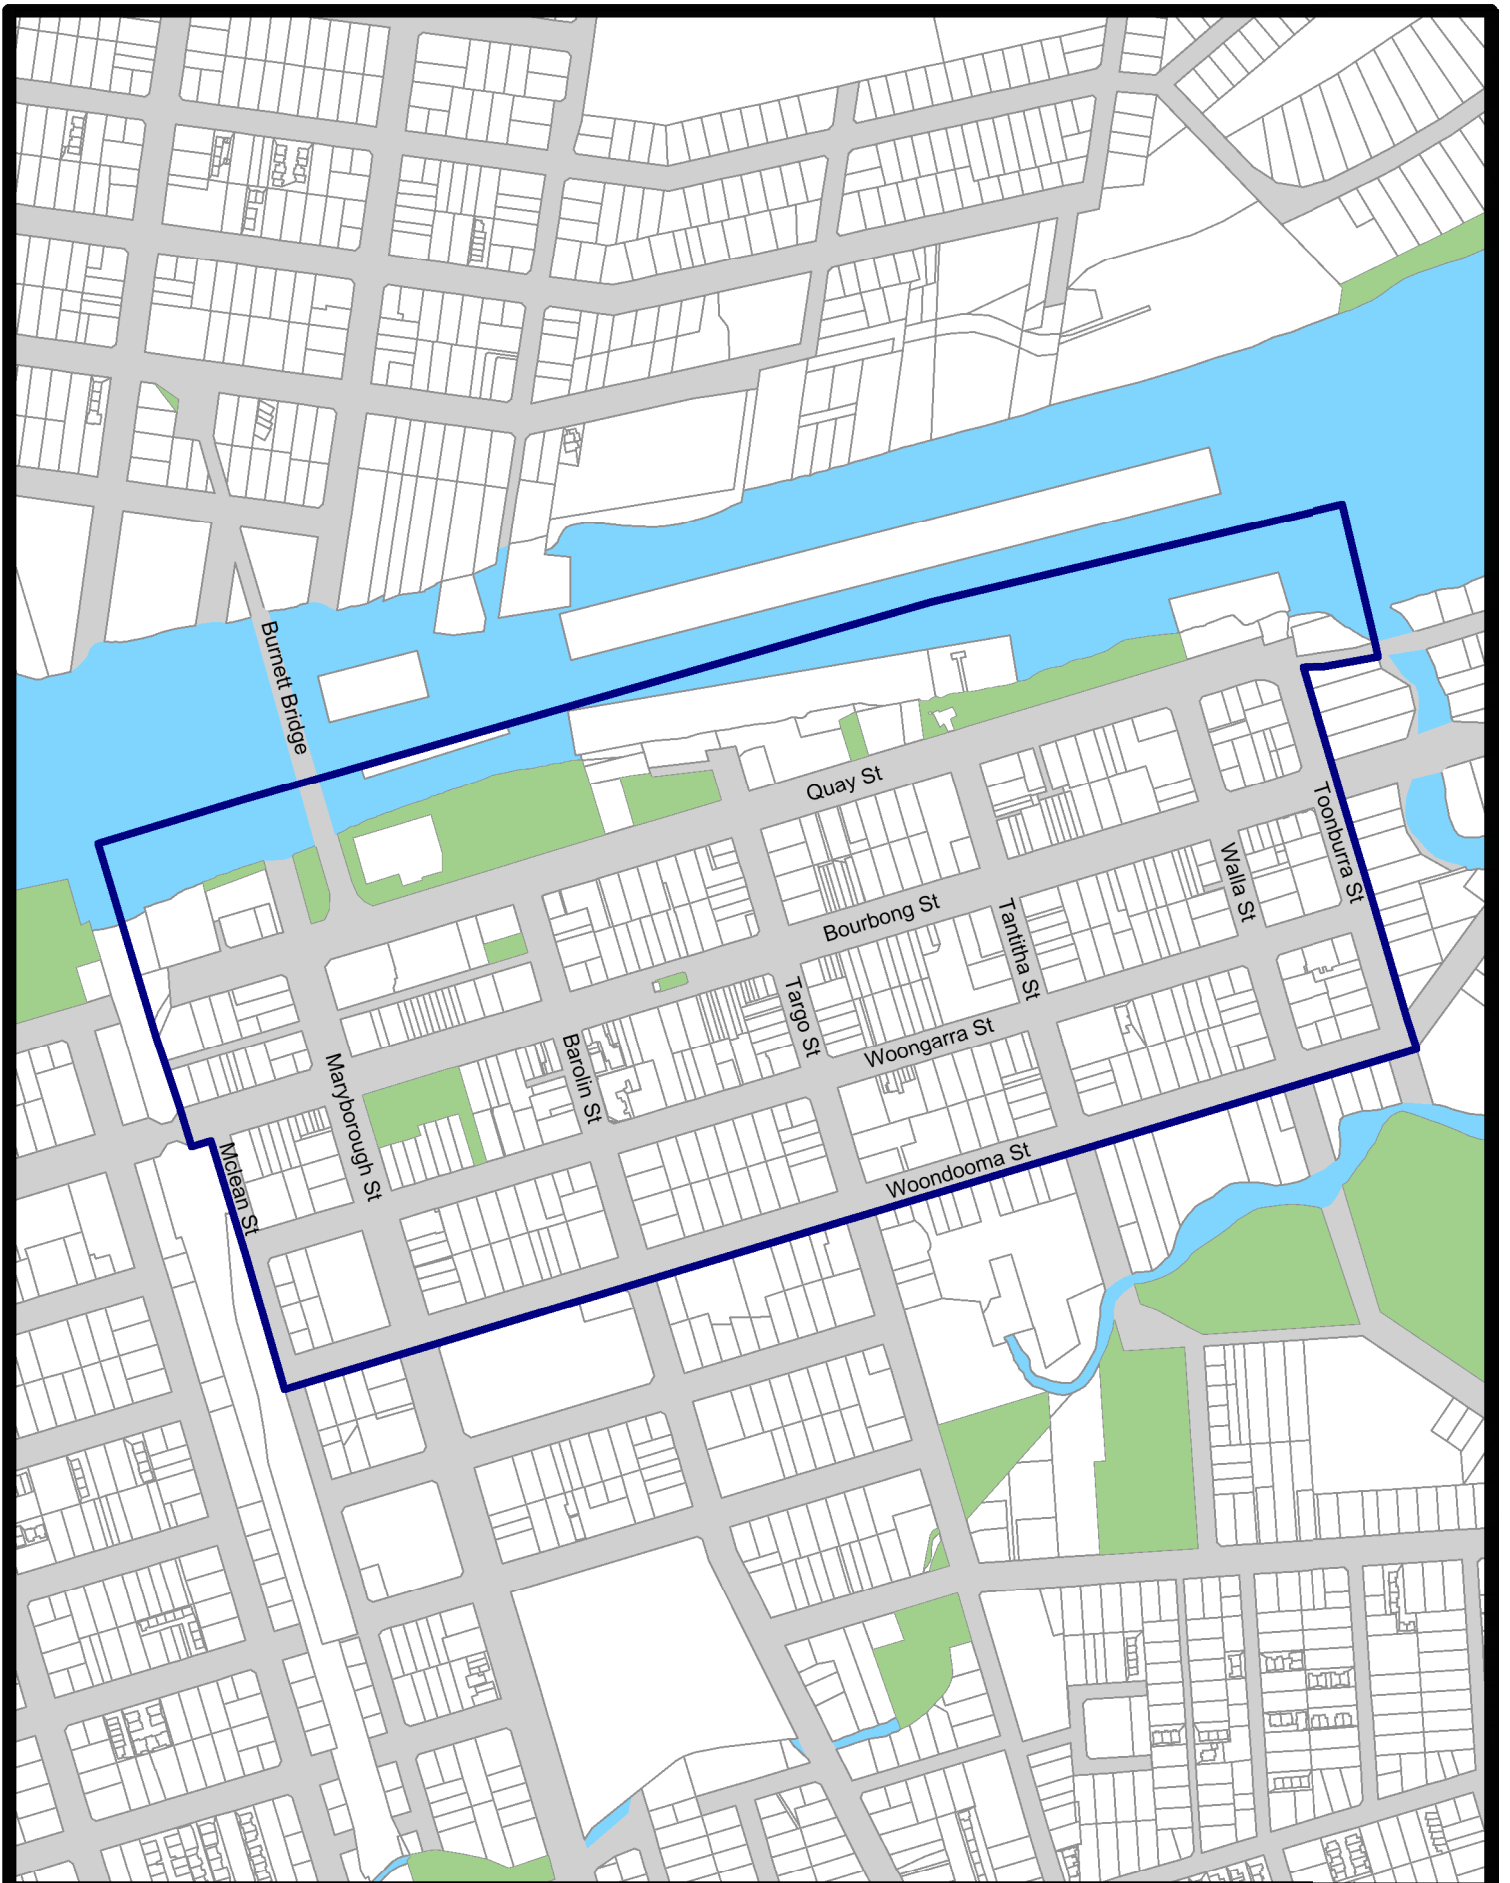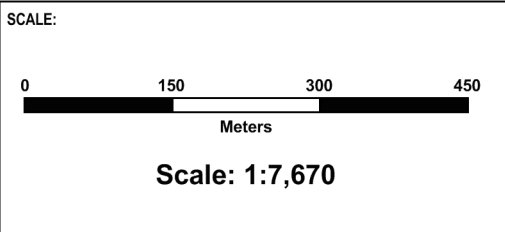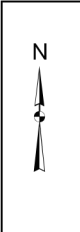

- LEGEND:**
-  Boundary of safe night precinct
  -  Waterway
  -  Parks and reserves
  -  Property boundaries
  -  Road casements

**BUNDABERG CBD**

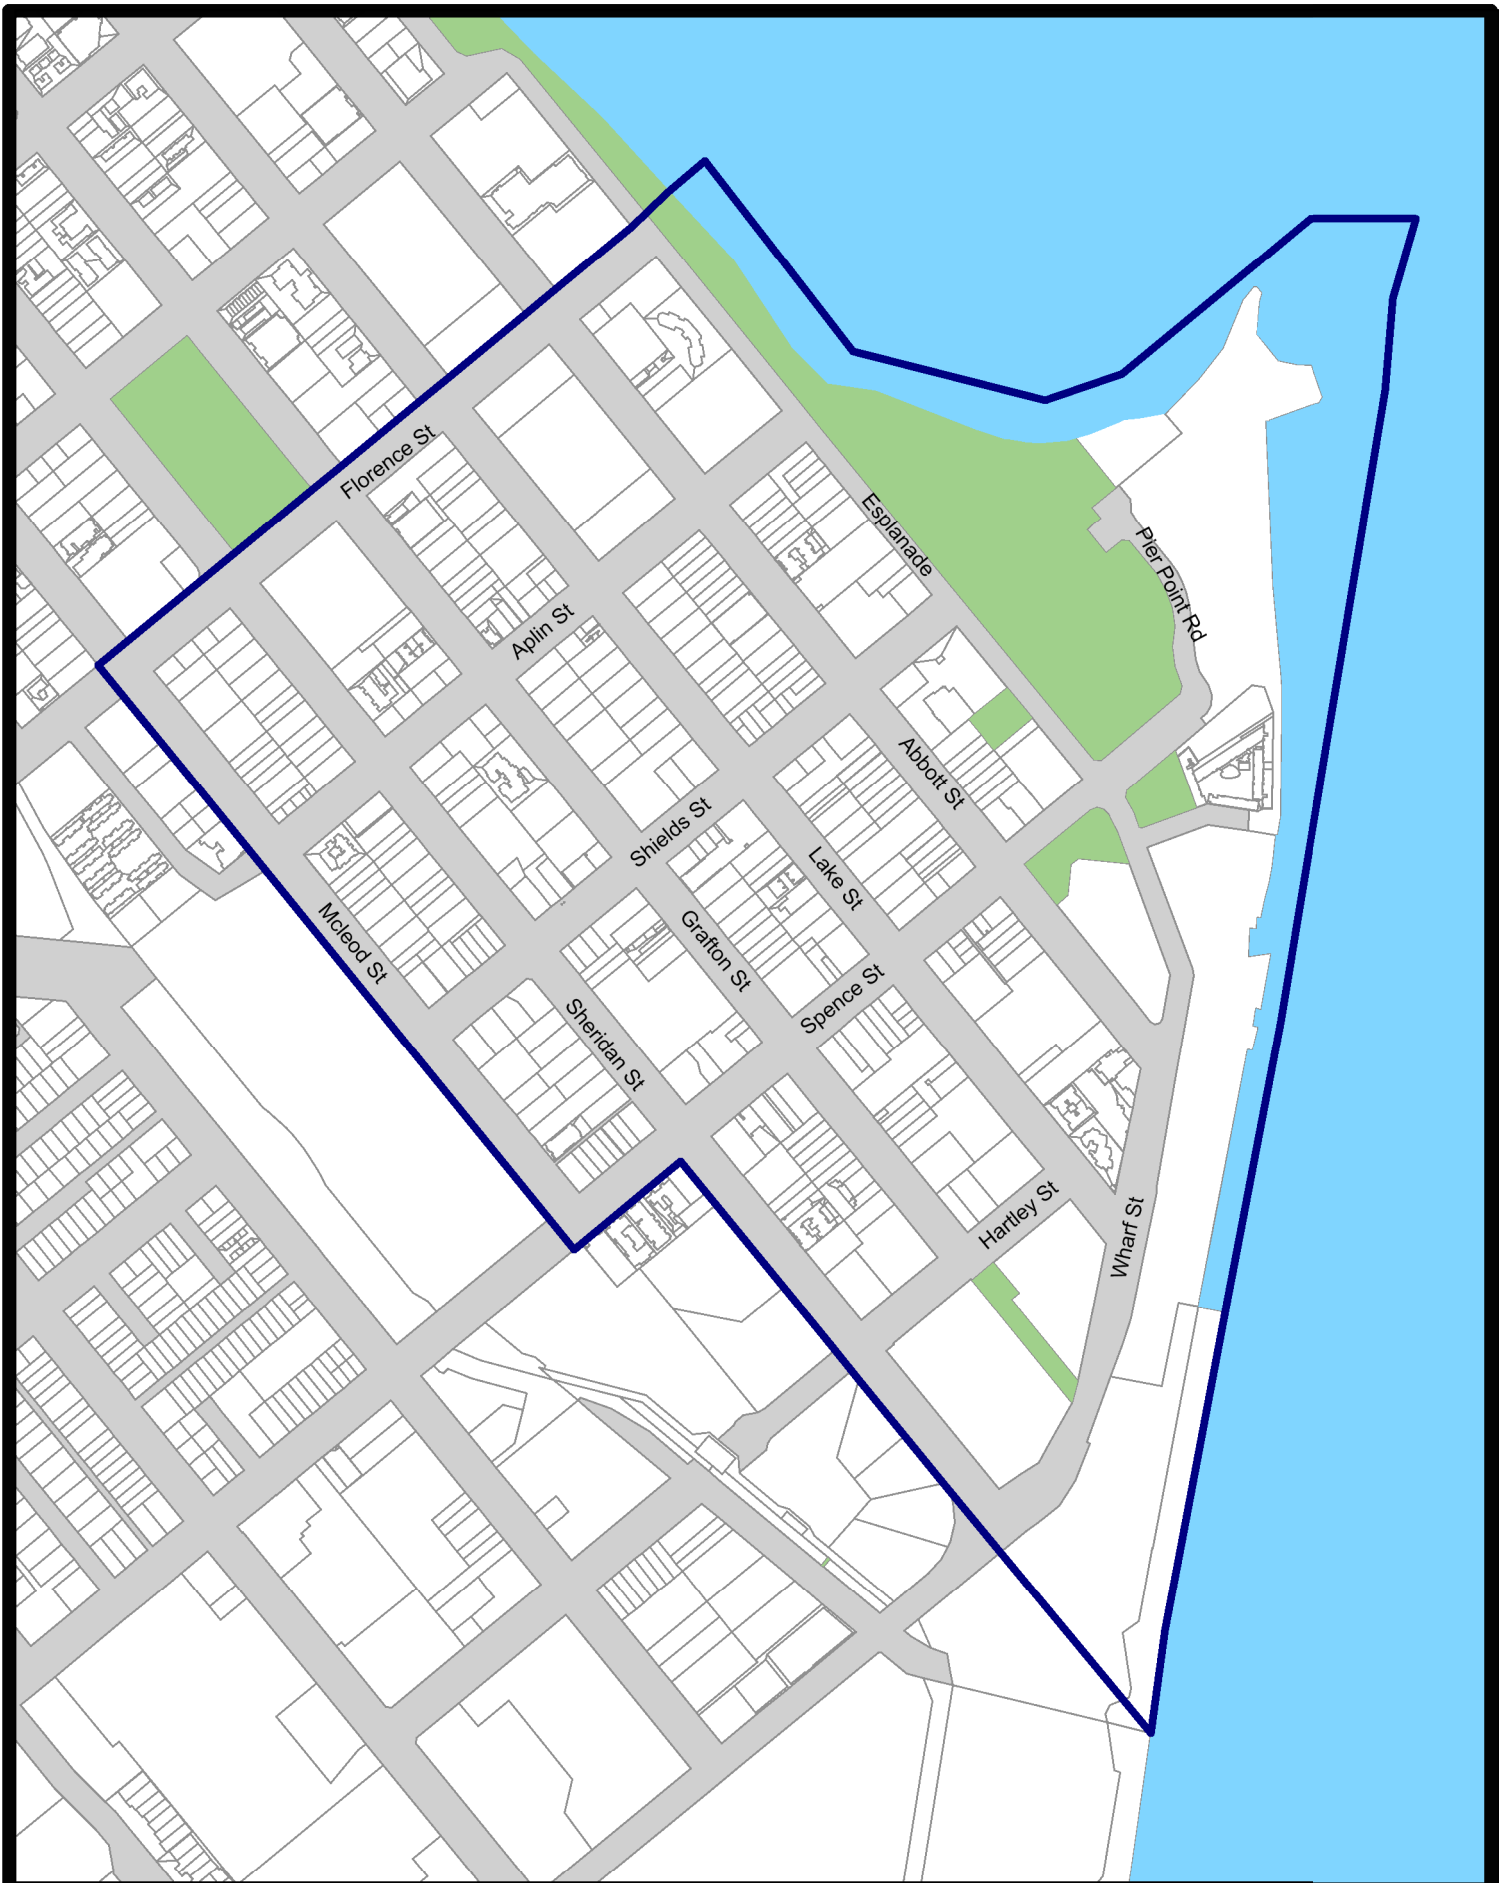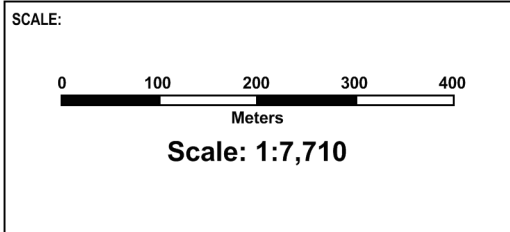

- LEGEND:**
-  Boundary of safe night precinct
  -  Waterway
  -  Parks and reserves
  -  Property boundaries
  -  Road casements

**CAIRNS CBD**

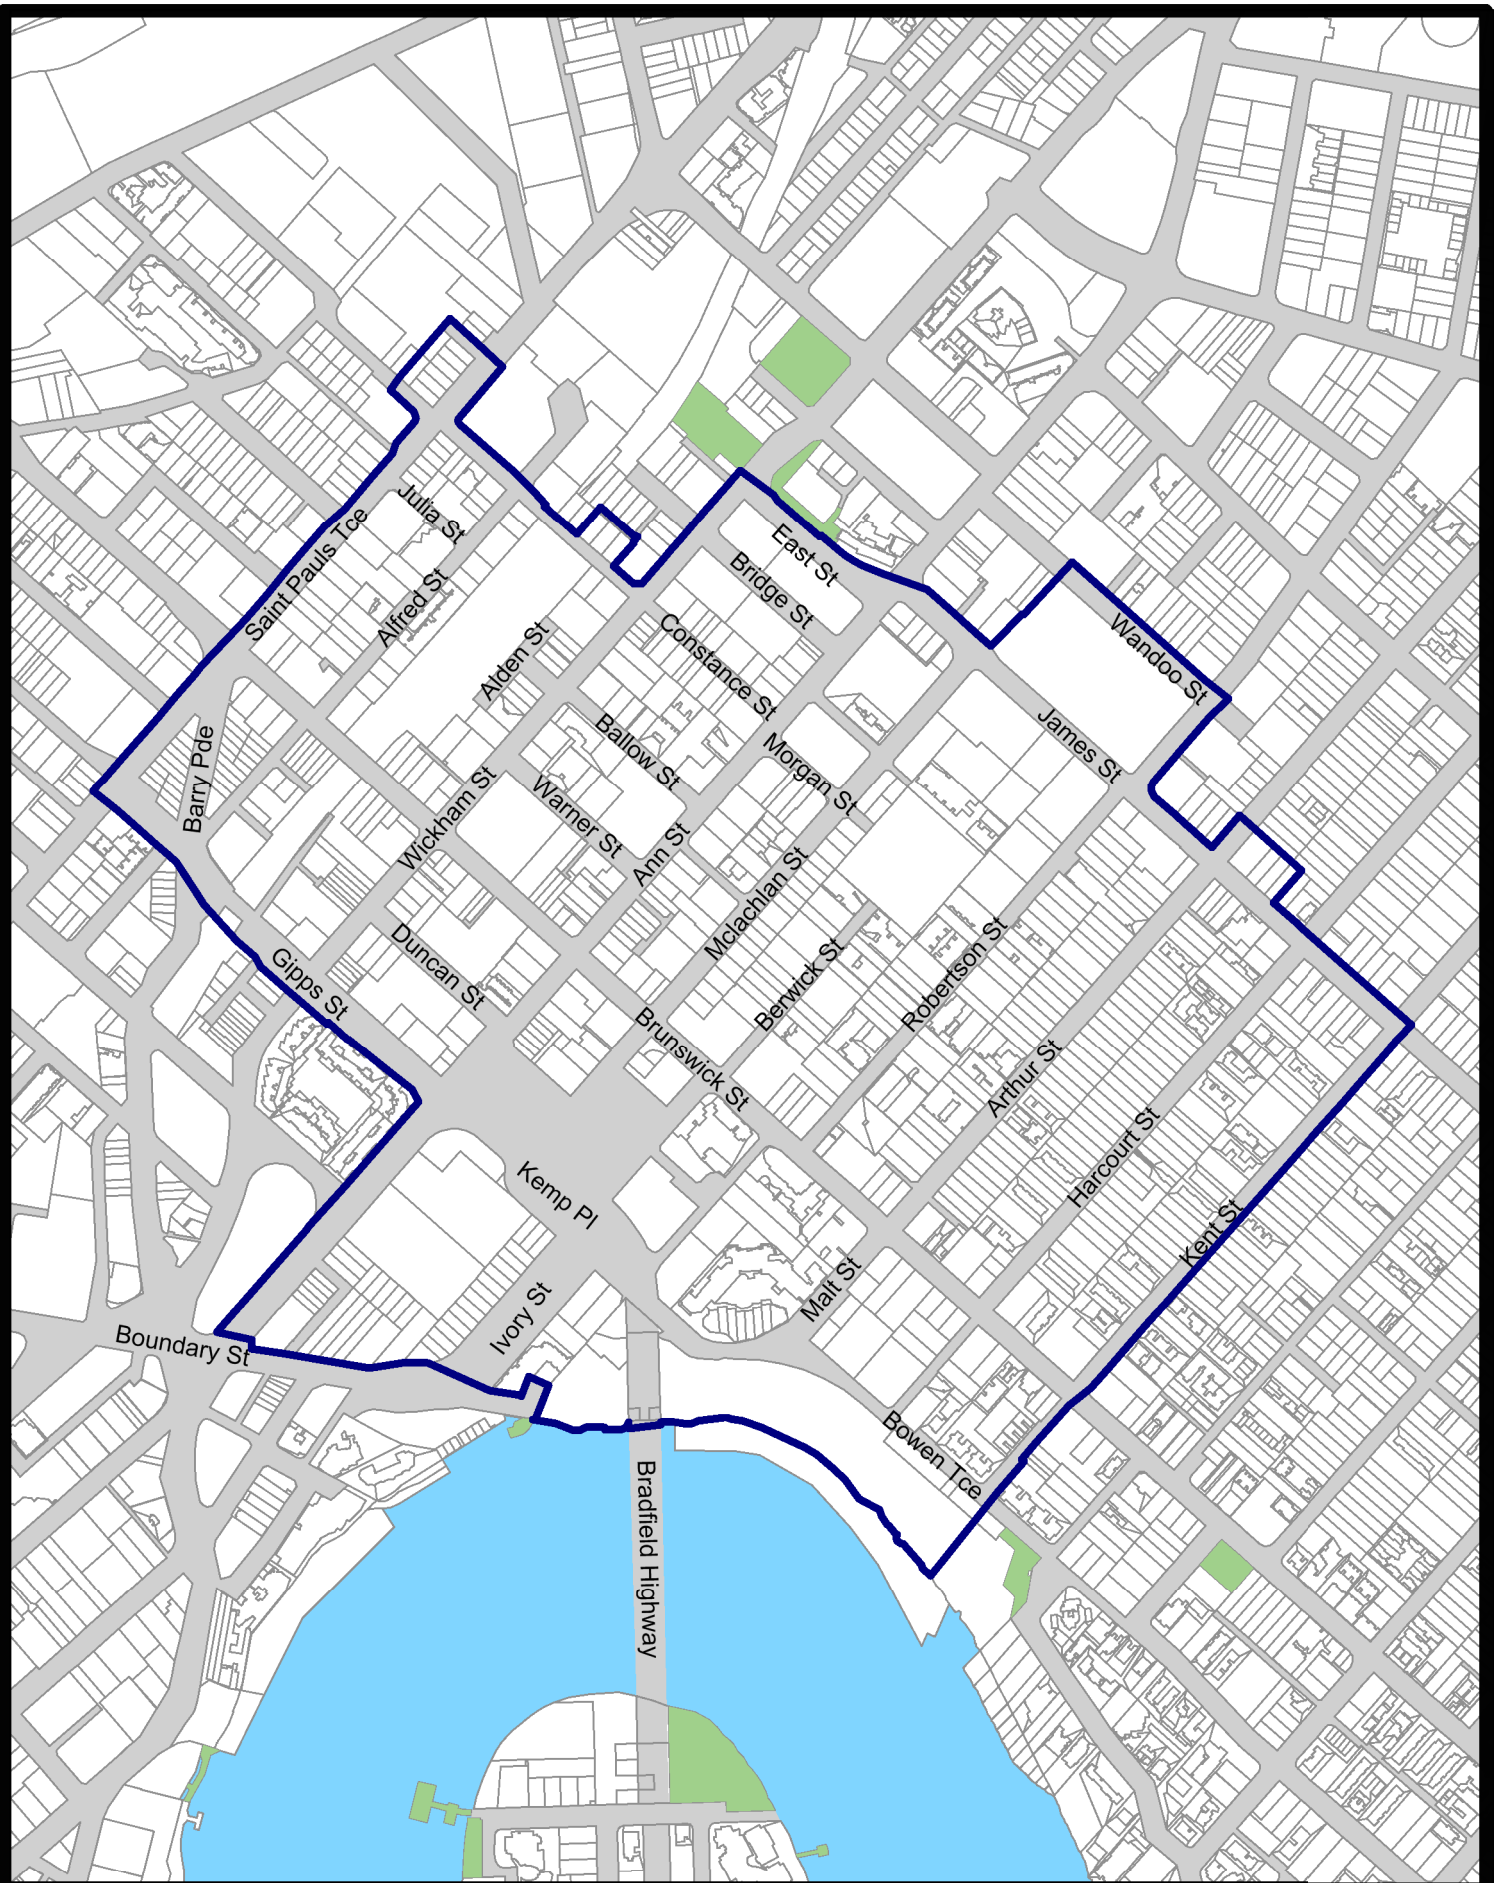

SCALE:

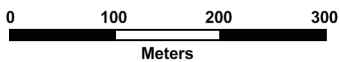

Scale: 1:7,170



LEGEND:

-  Boundary of safe night precinct
-  Waterway
-  Parks and reserves
-  Property boundaries
-  Road casements

## FORTITUDE VALLEY

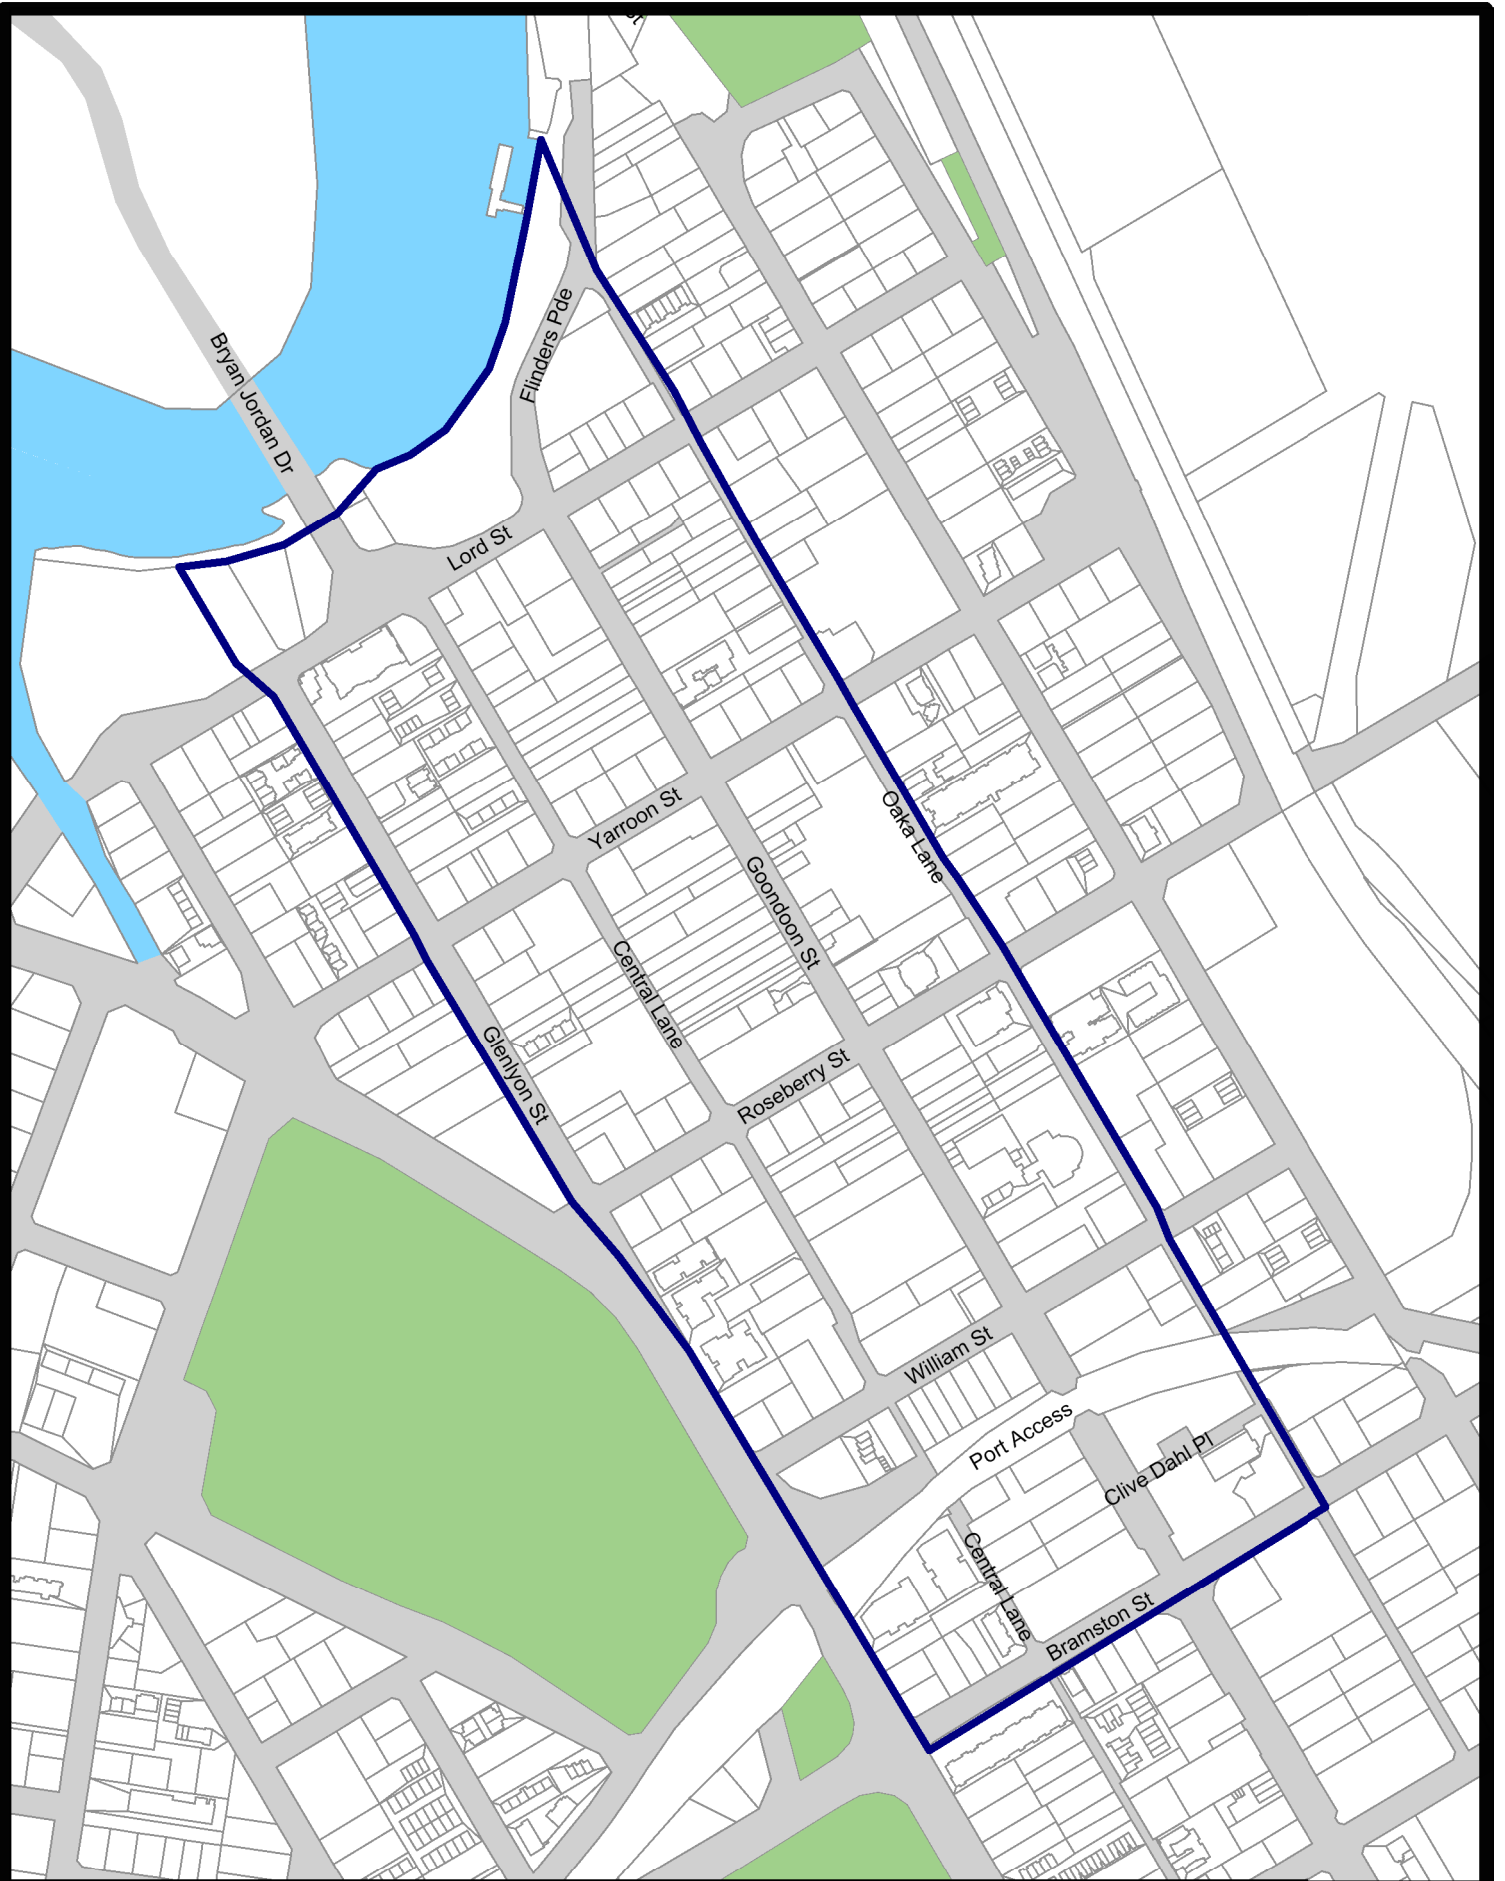

**SCALE:**

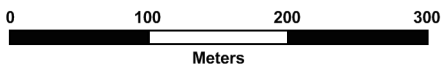

**Scale: 1:5,420**



**LEGEND:**

-  Boundary of safe night precinct
-  Waterway
-  Parks and reserves
-  Property boundaries
-  Road casements

**GLADSTONE CBD**

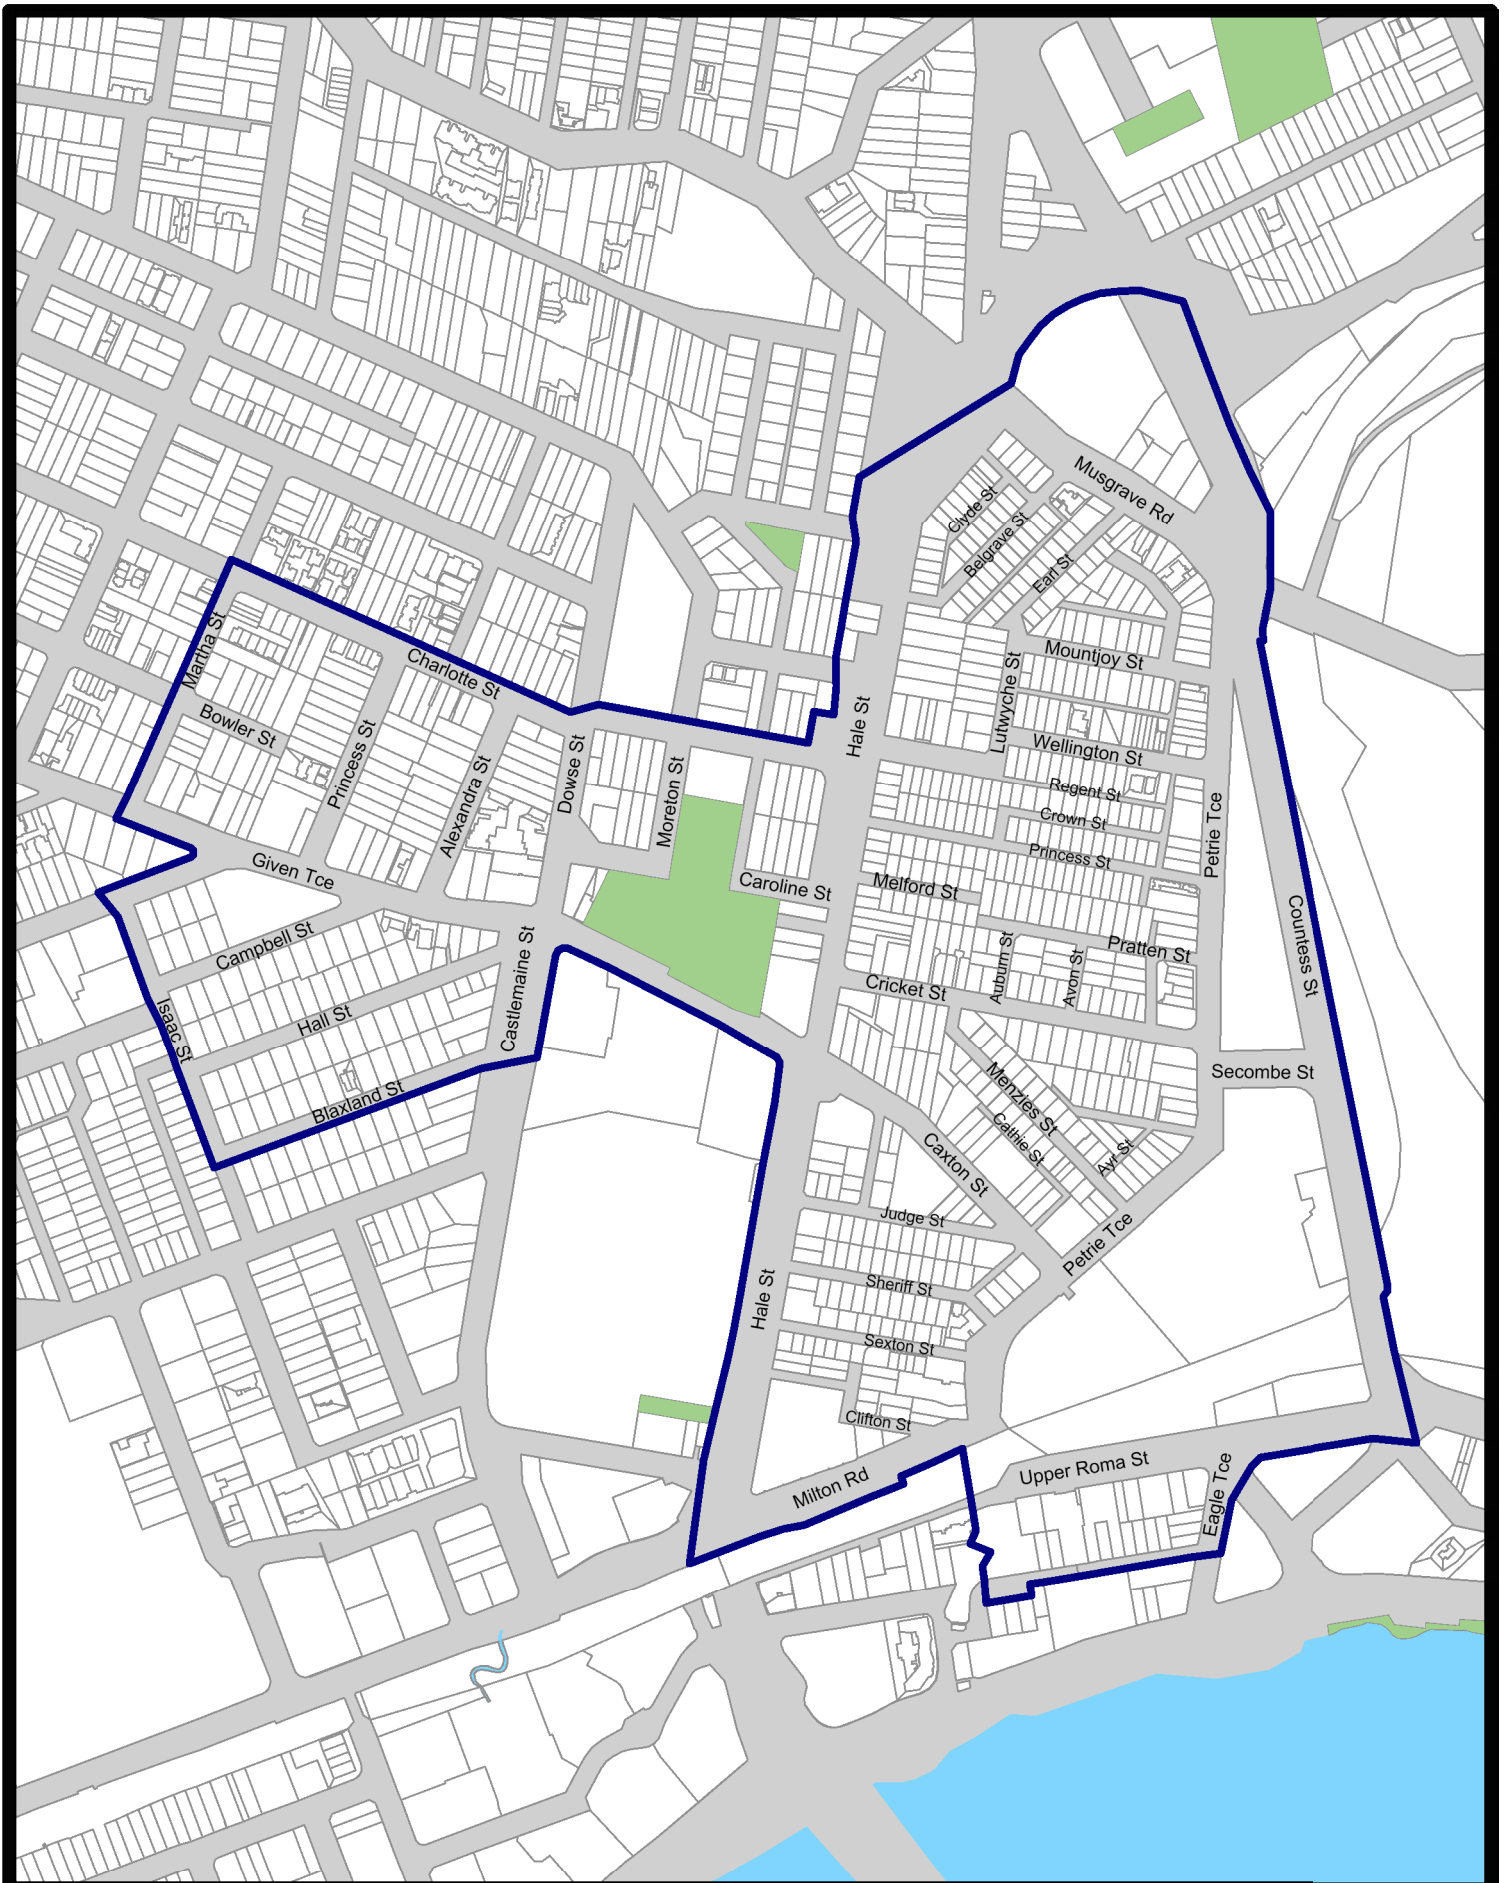

**SCALE:**

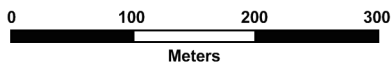

**Scale: 1:6,170**



**LEGEND:**

-  Boundary of safe night precinct
-  Waterway
-  Parks and reserves
-  Property boundaries
-  Road casements

**INNER WEST BRISBANE**



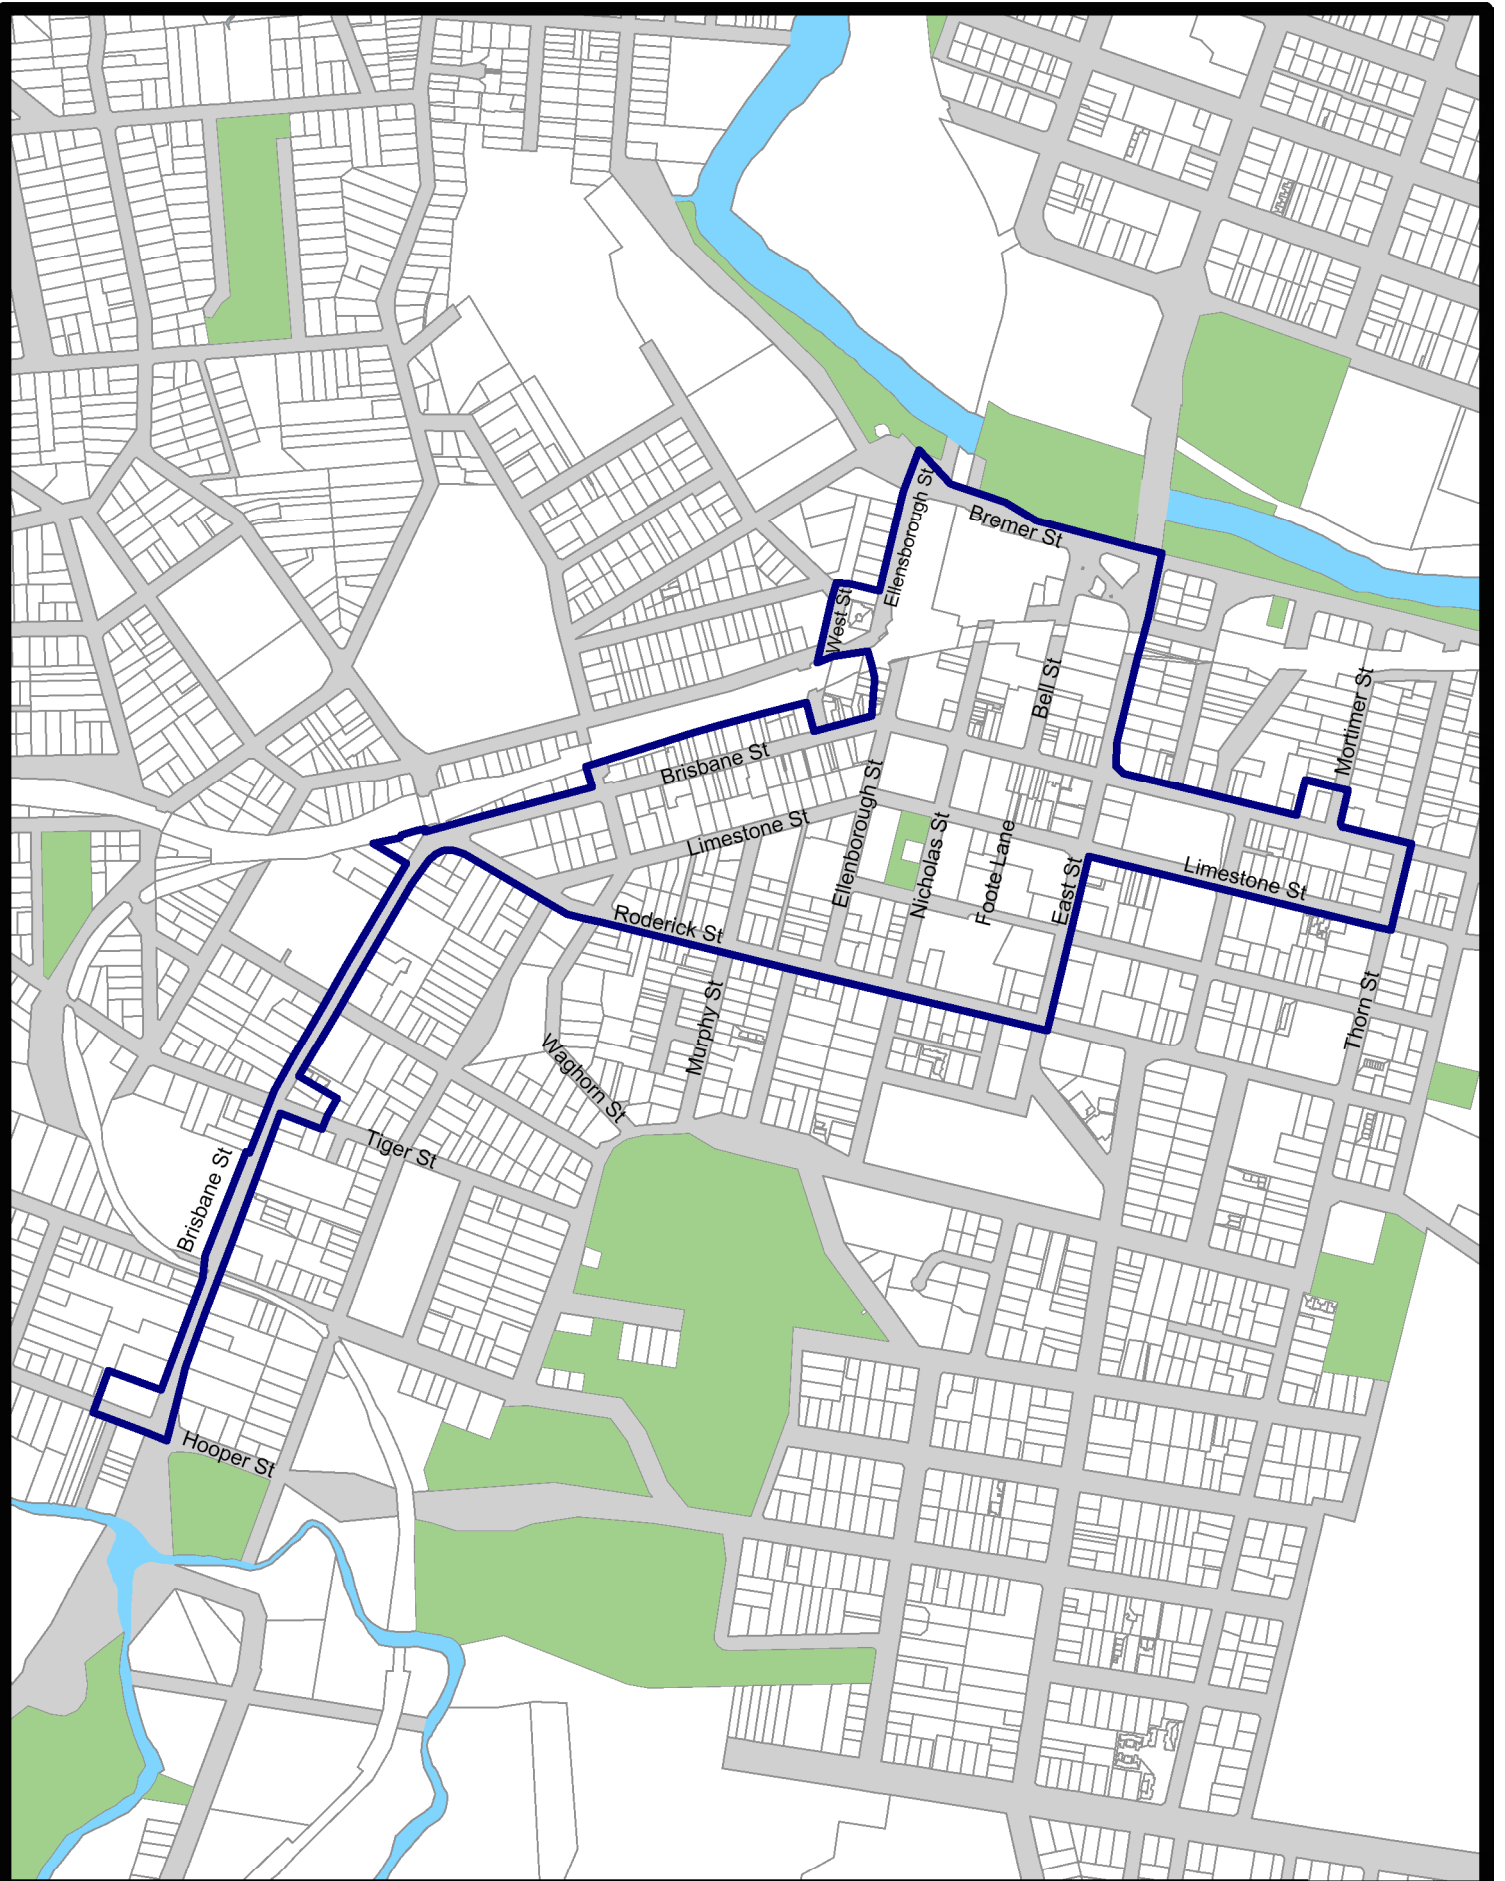

**SCALE:**

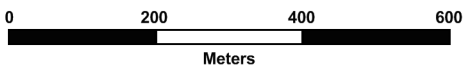

**Scale: 1:10,280**



**LEGEND:**

-  Boundary of safe night precinct
-  Waterway
-  Parks and reserves
-  Property boundaries
-  Road casements

**IPSWICH CBD**

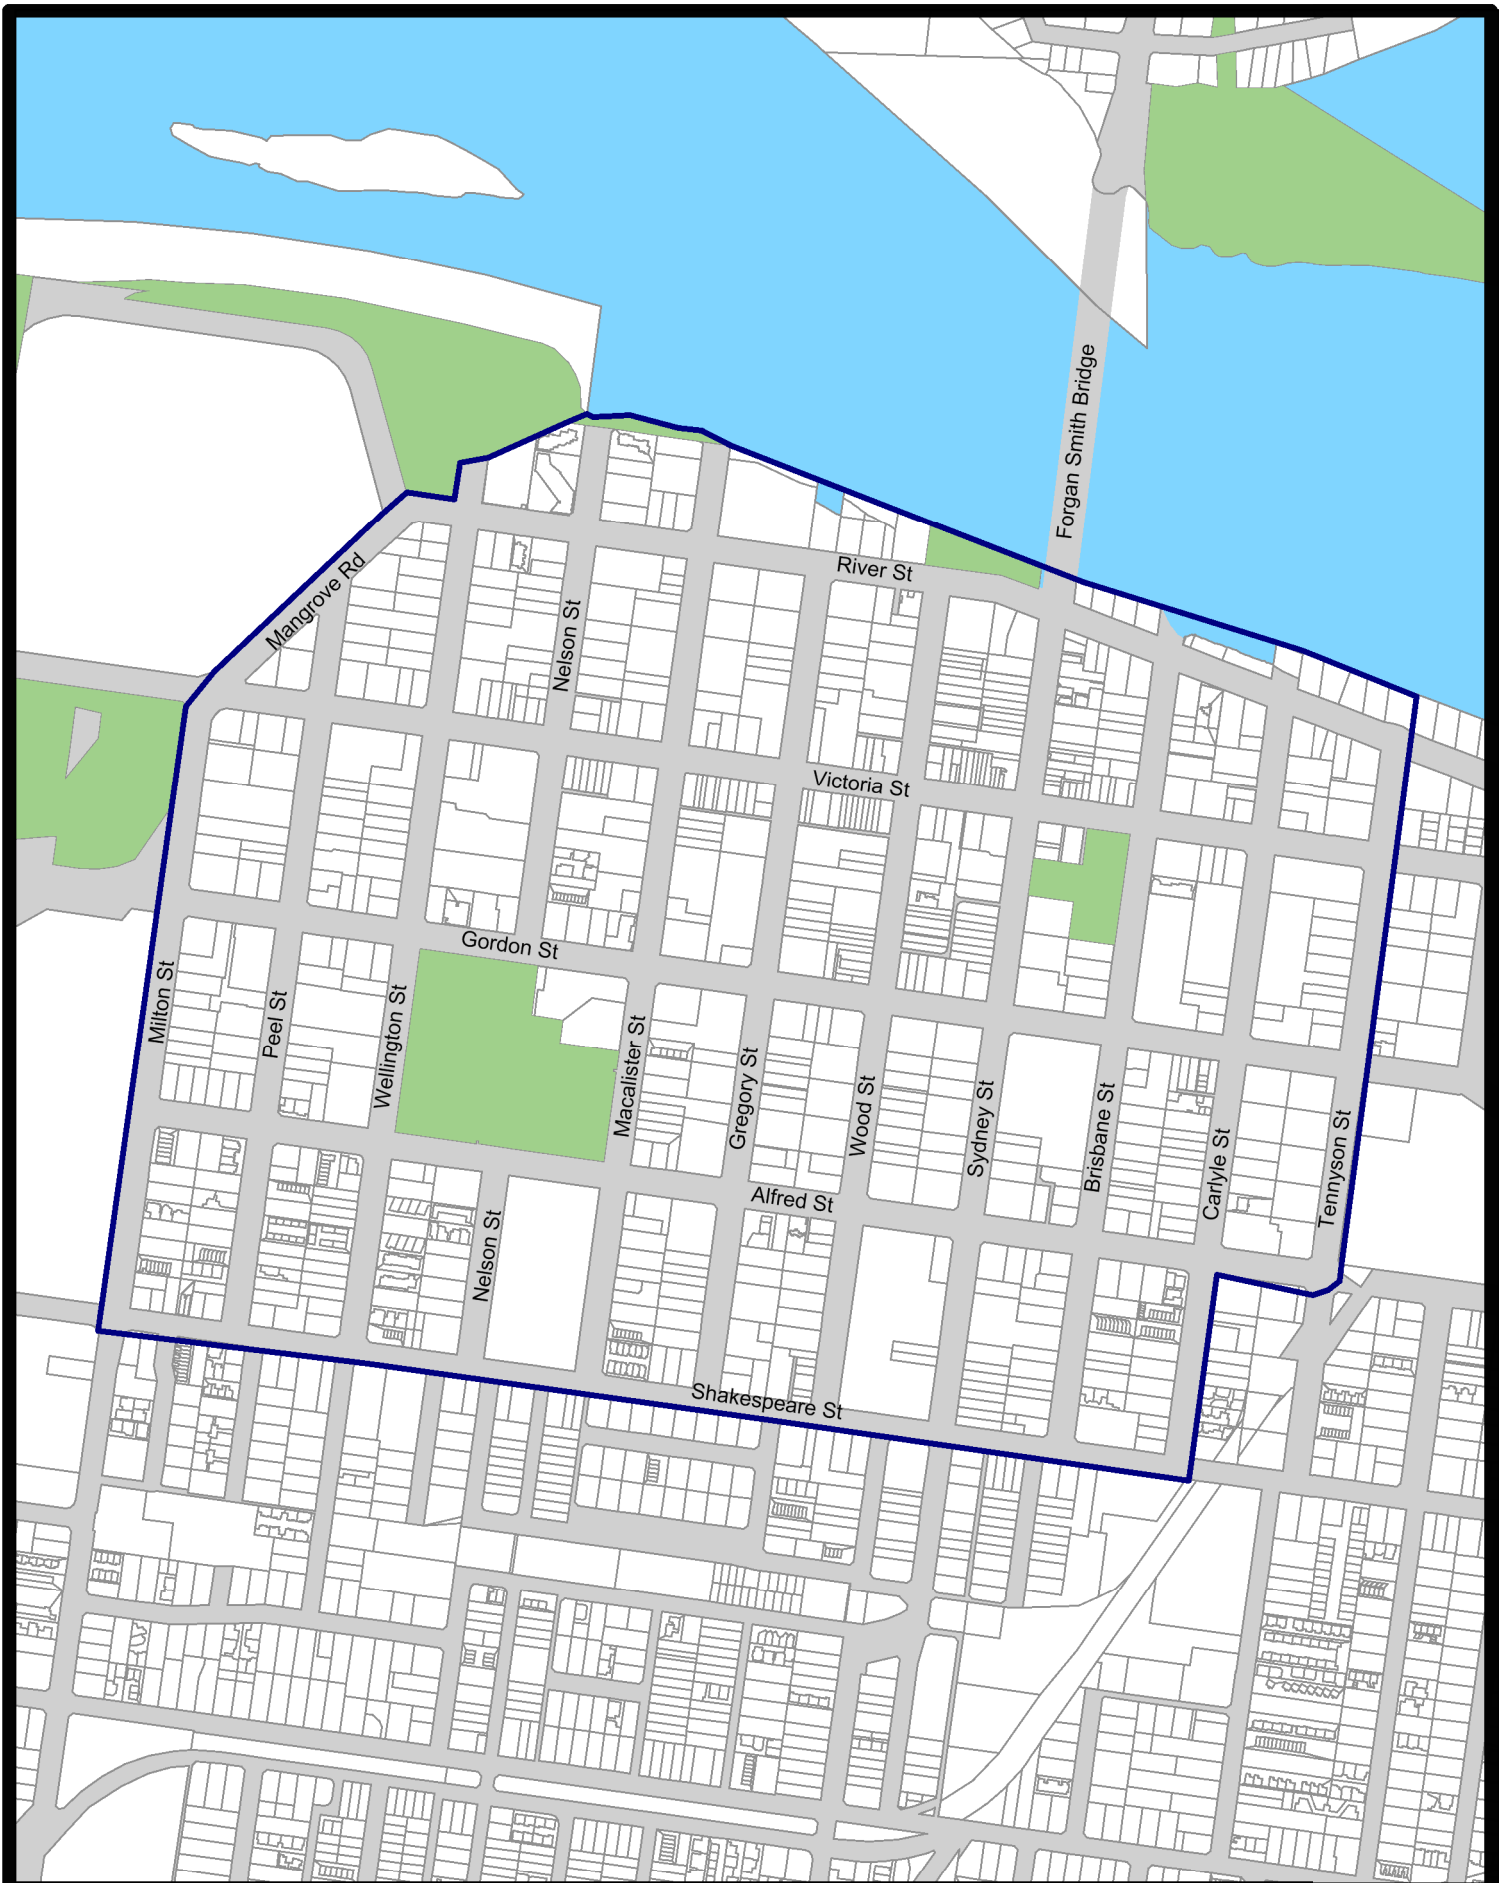

**SCALE:**

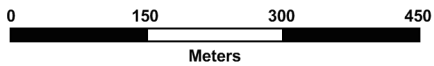

**Scale: 1:8,300**



**LEGEND:**

- Boundary of safe night precinct
- Waterway
- Parks and reserves
- Property boundaries
- Road casements

**MACKAY CBD**

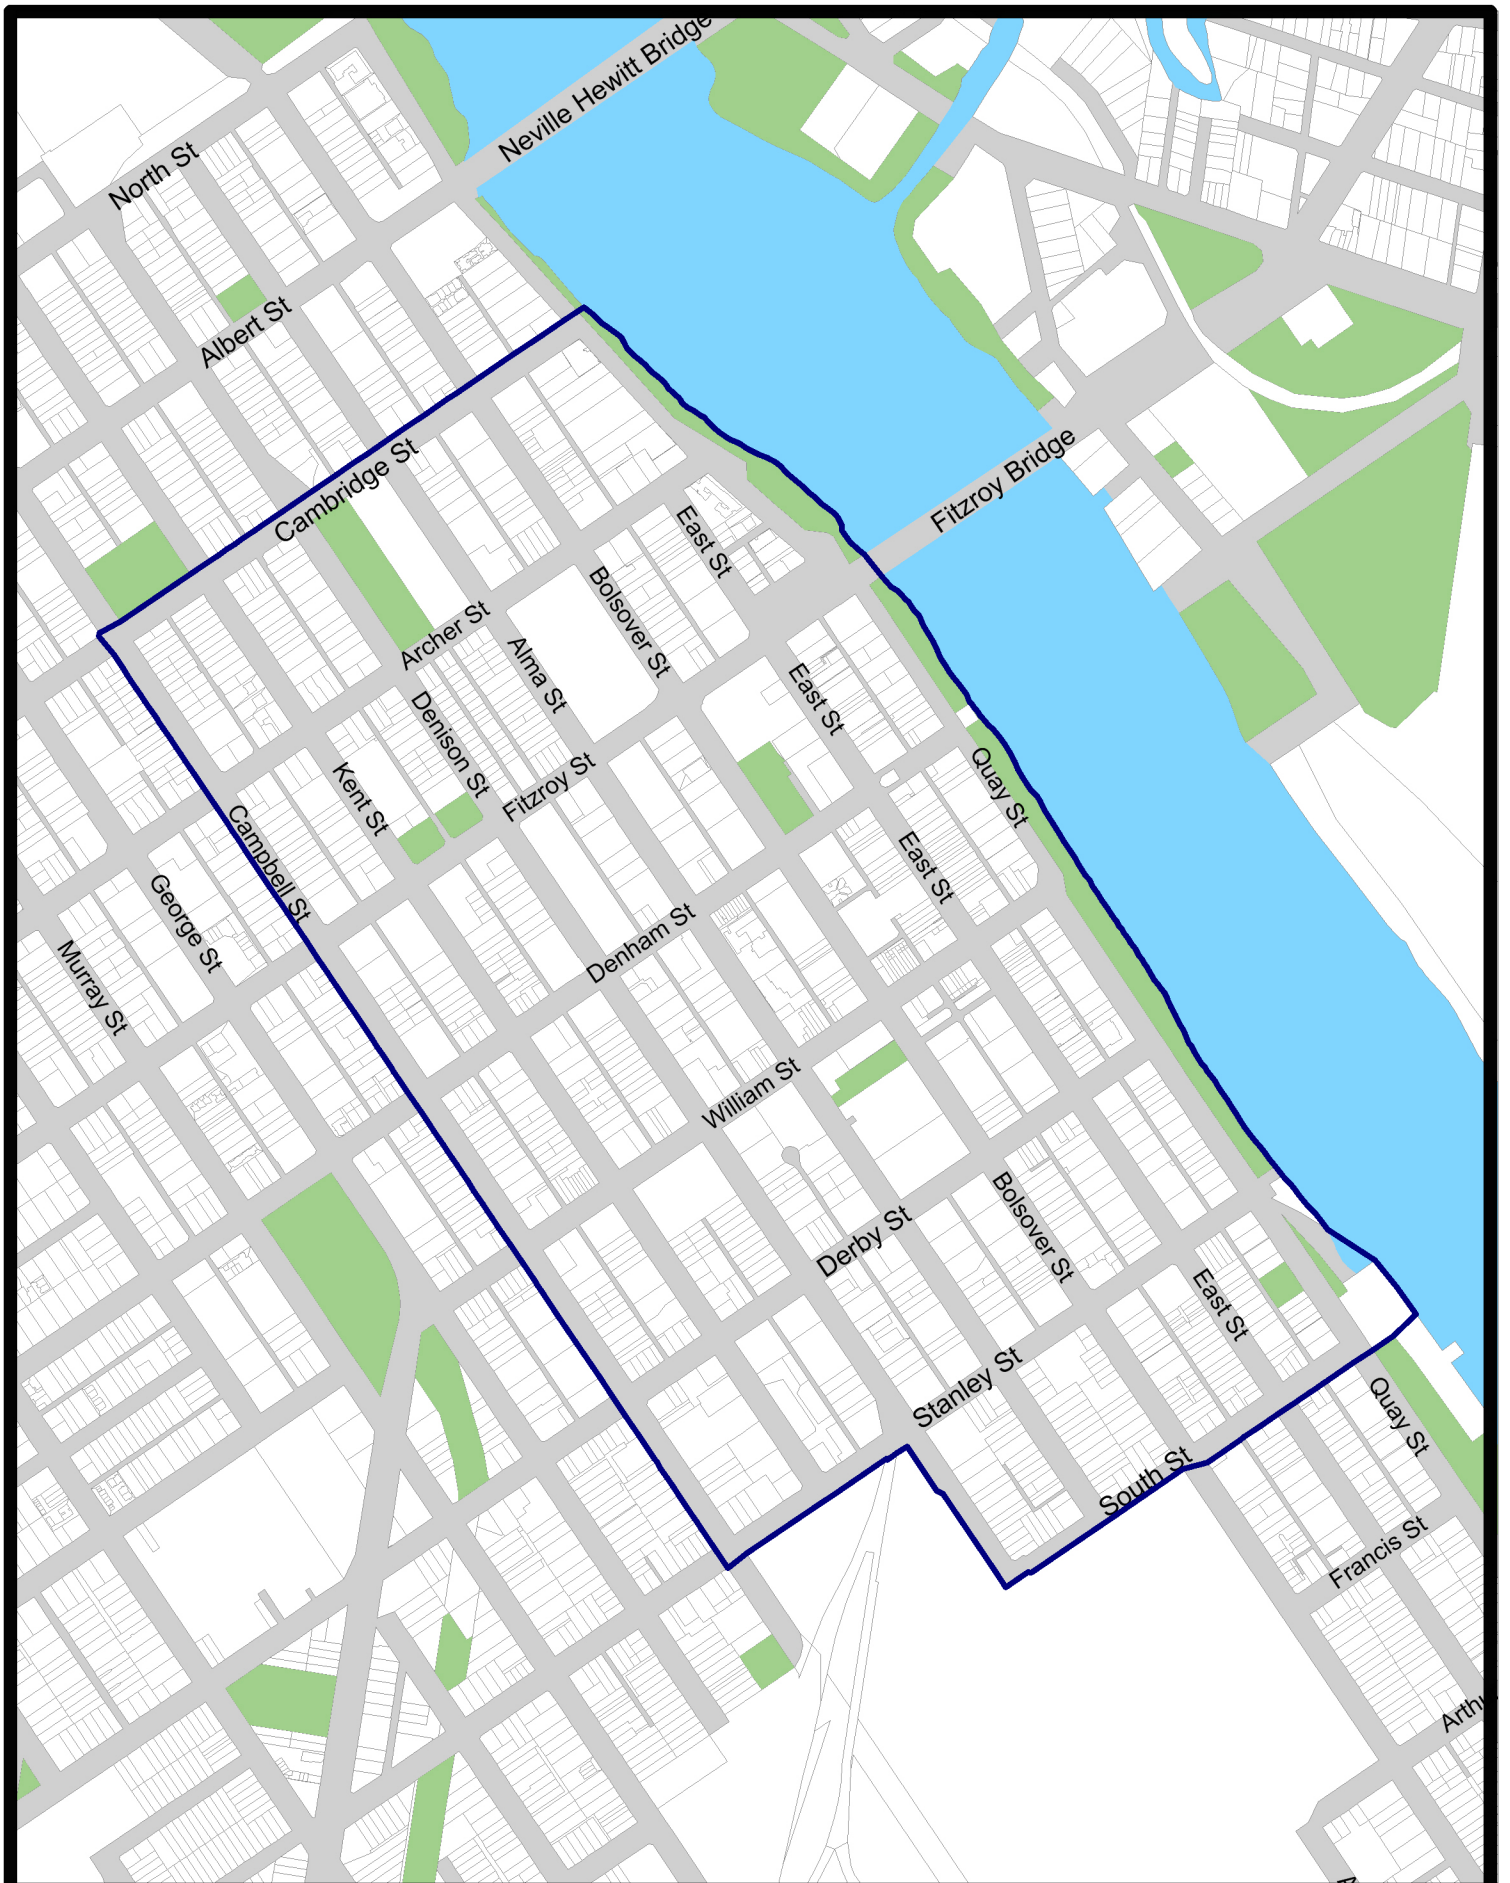

**SCALE:**

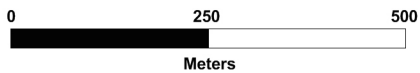

**Scale: 1:10,000**

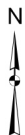

**LEGEND:**

- Boundary of safe night precinct
- Waterway
- Parks and reserves
- Property boundaries
- Road casements

**ROCKHAMPTON CBD**

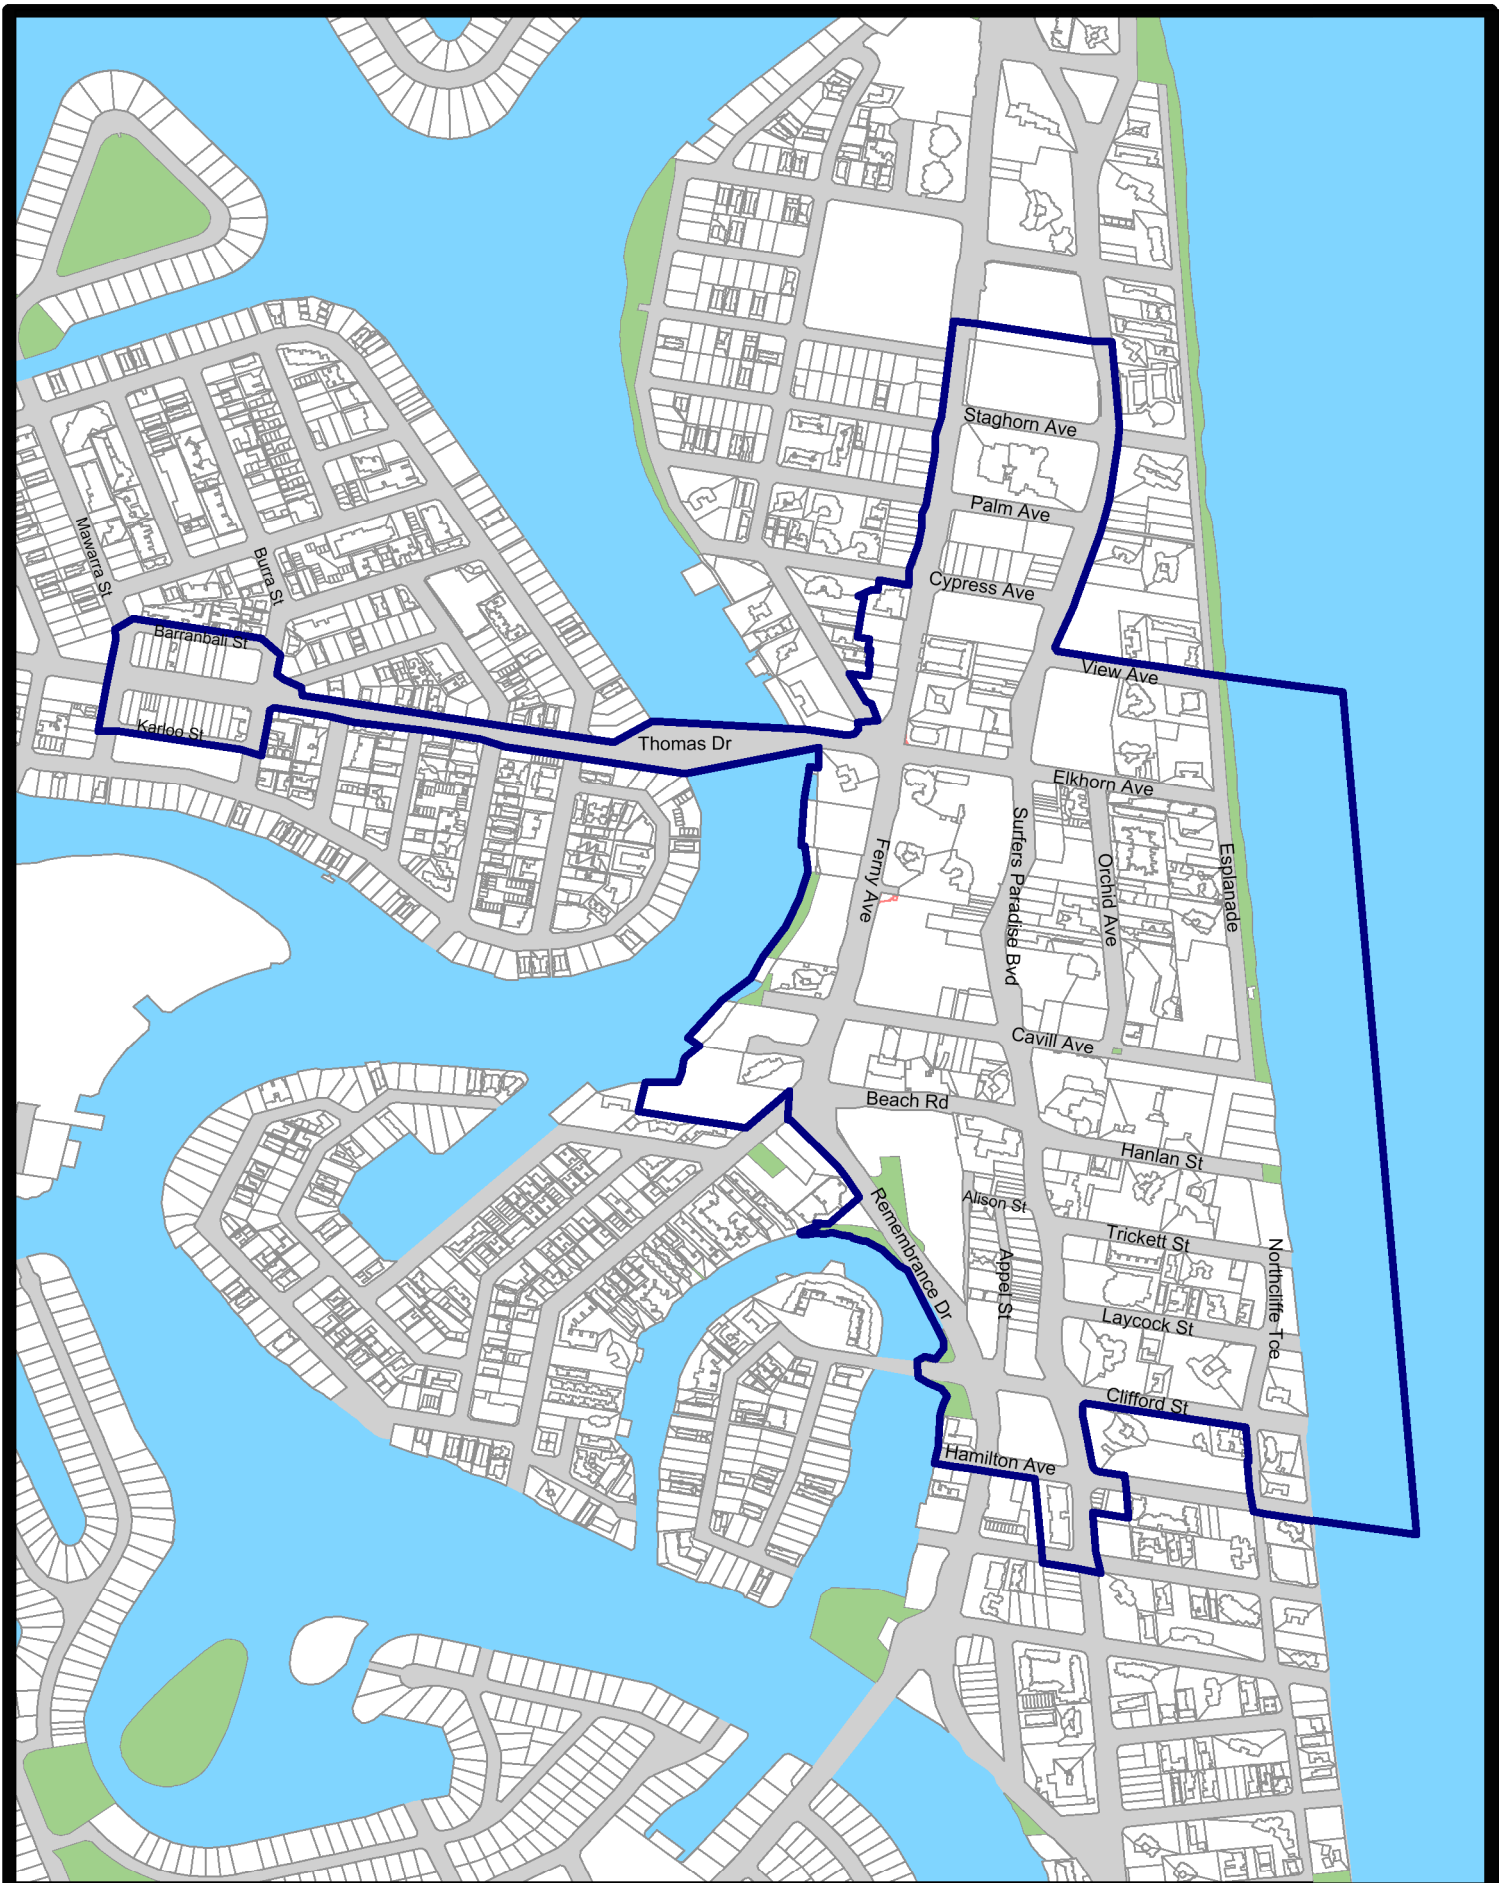

SCALE:

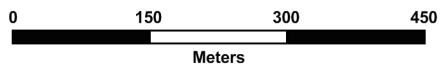

Scale: 1:8,250



LEGEND:

- Boundary of safe night precinct
- Waterway
- Parks and reserves
- Property boundaries
- Road casements

## SURFERS PARADISE CBD

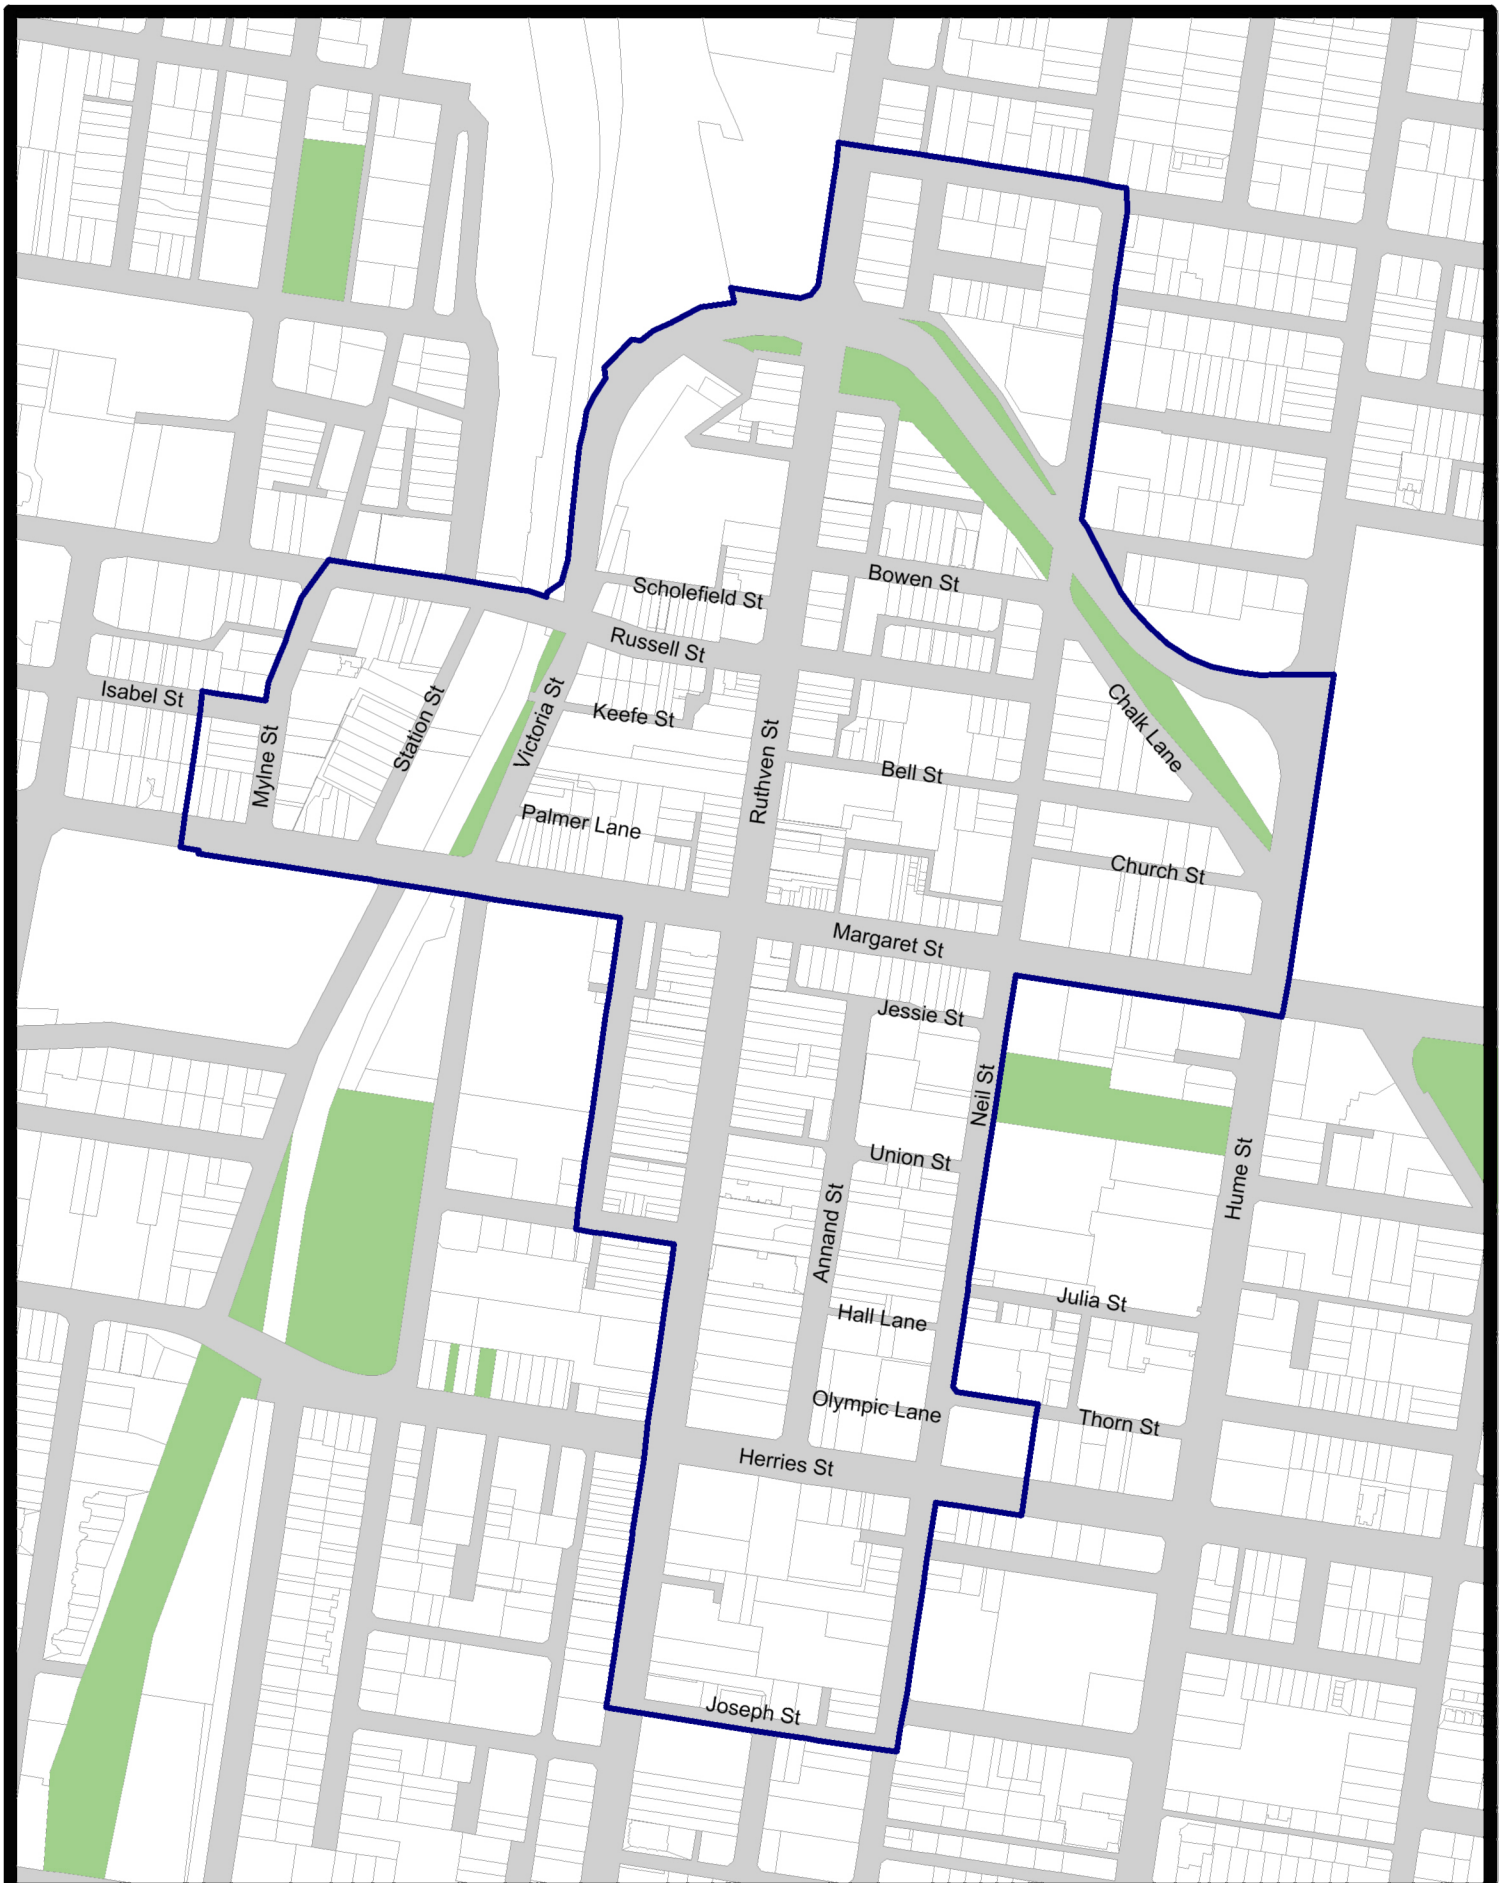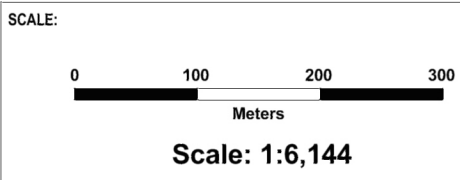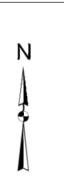

- LEGEND:**
-  Boundary of safe night precinct
  -  Waterway
  -  Parks and reserves
  -  Property boundaries
  -  Road casements

**TOOWOOMBA CBD**

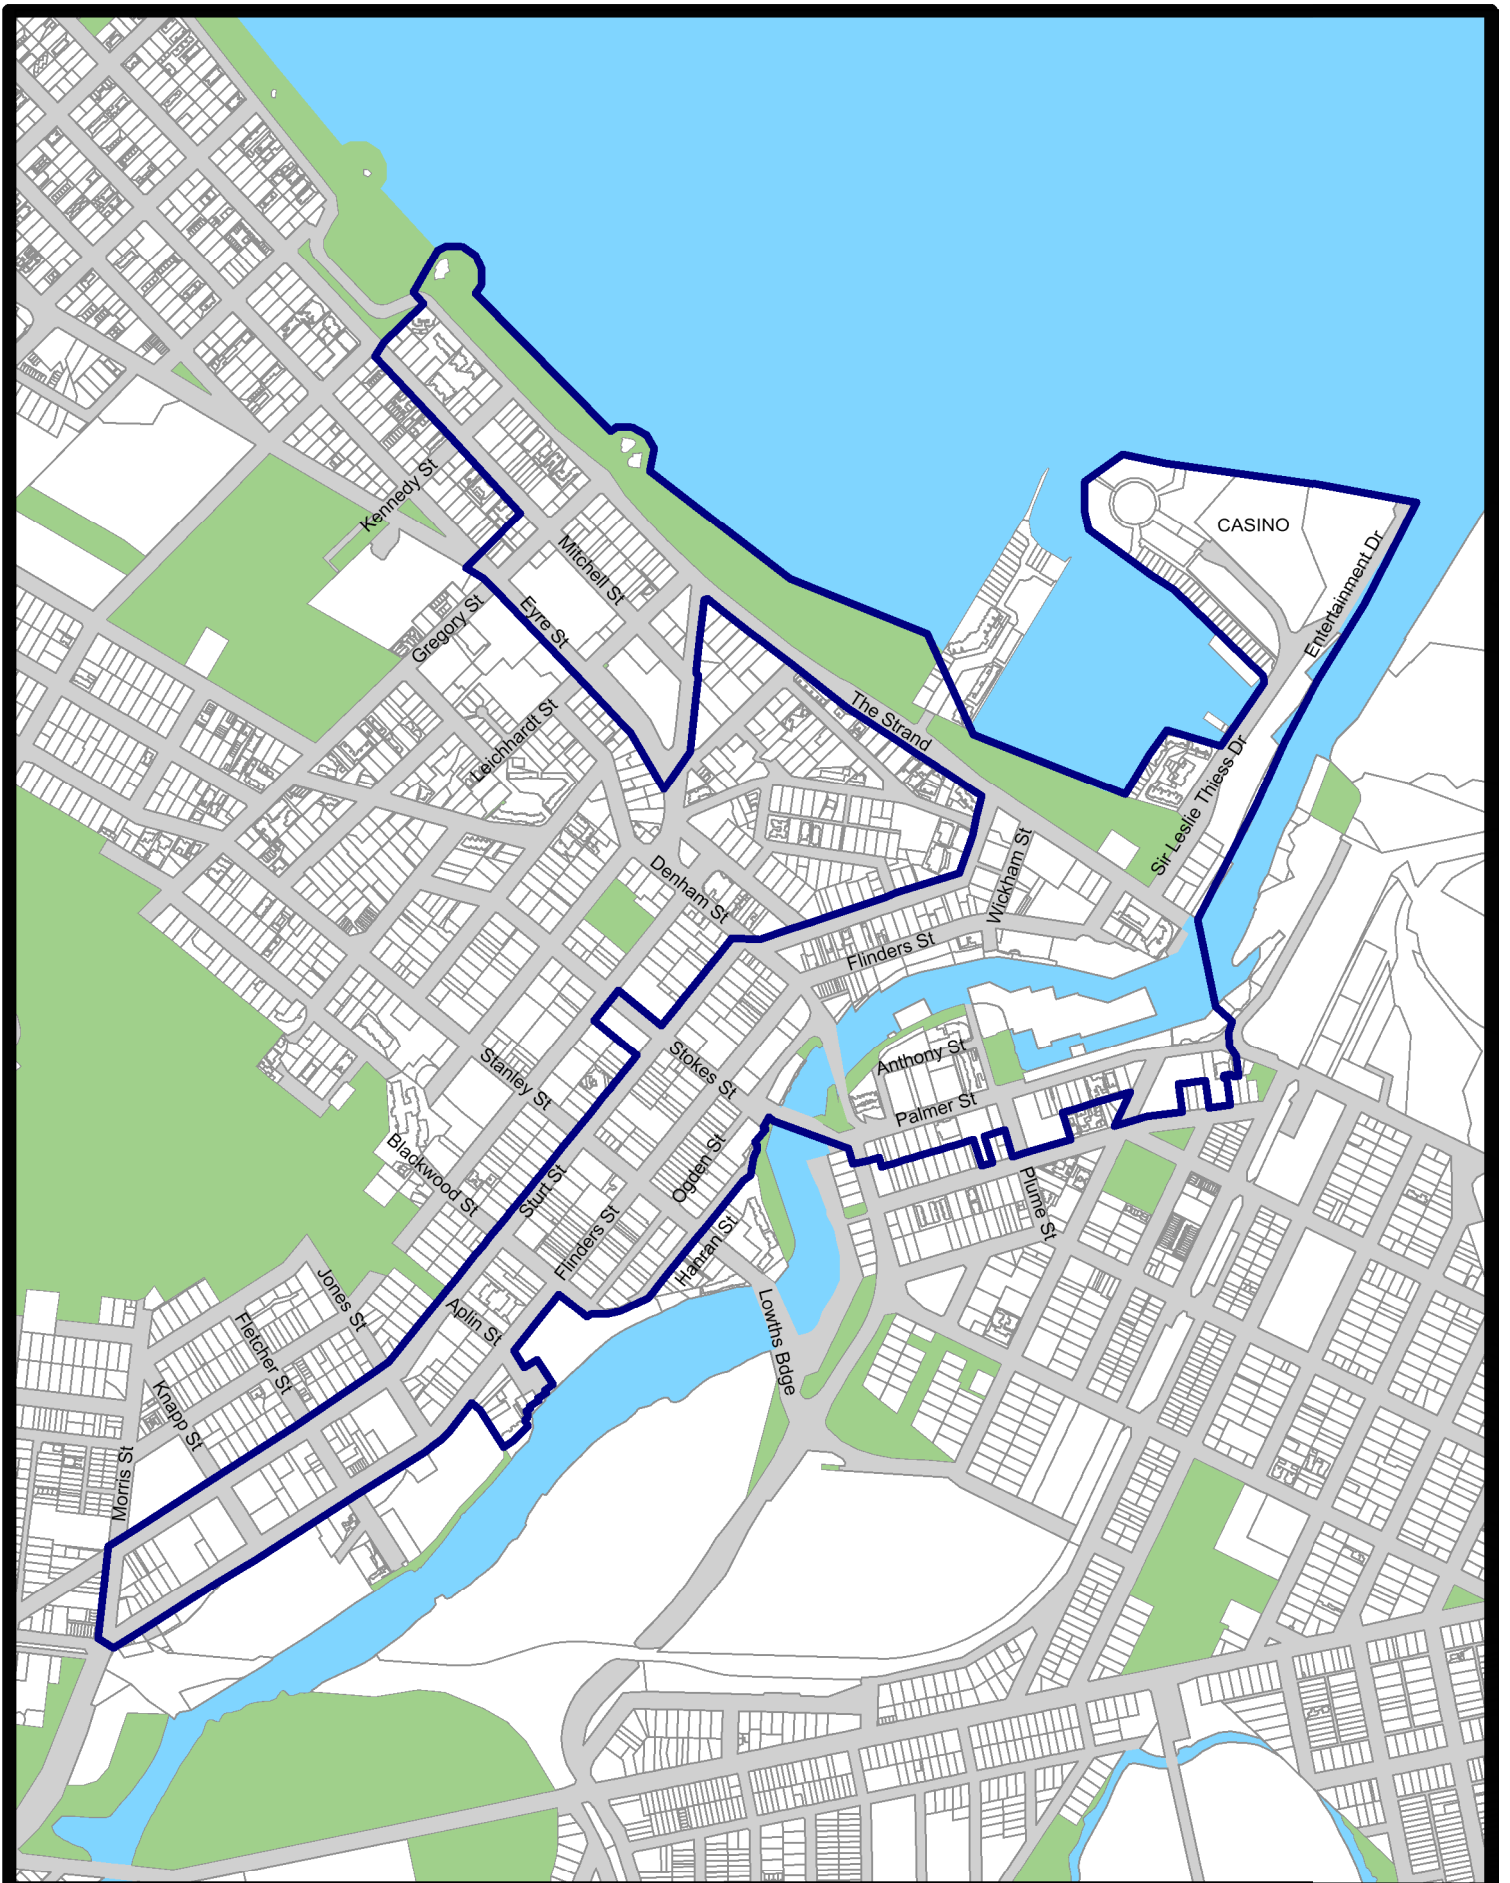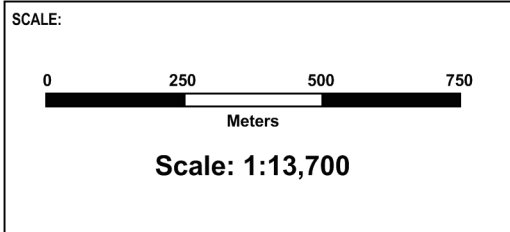

- LEGEND:
- Boundary of safe night precinct
  - Waterway
  - Parks and reserves
  - Property boundaries
  - Road casements

## TOWNSVILLE CBD

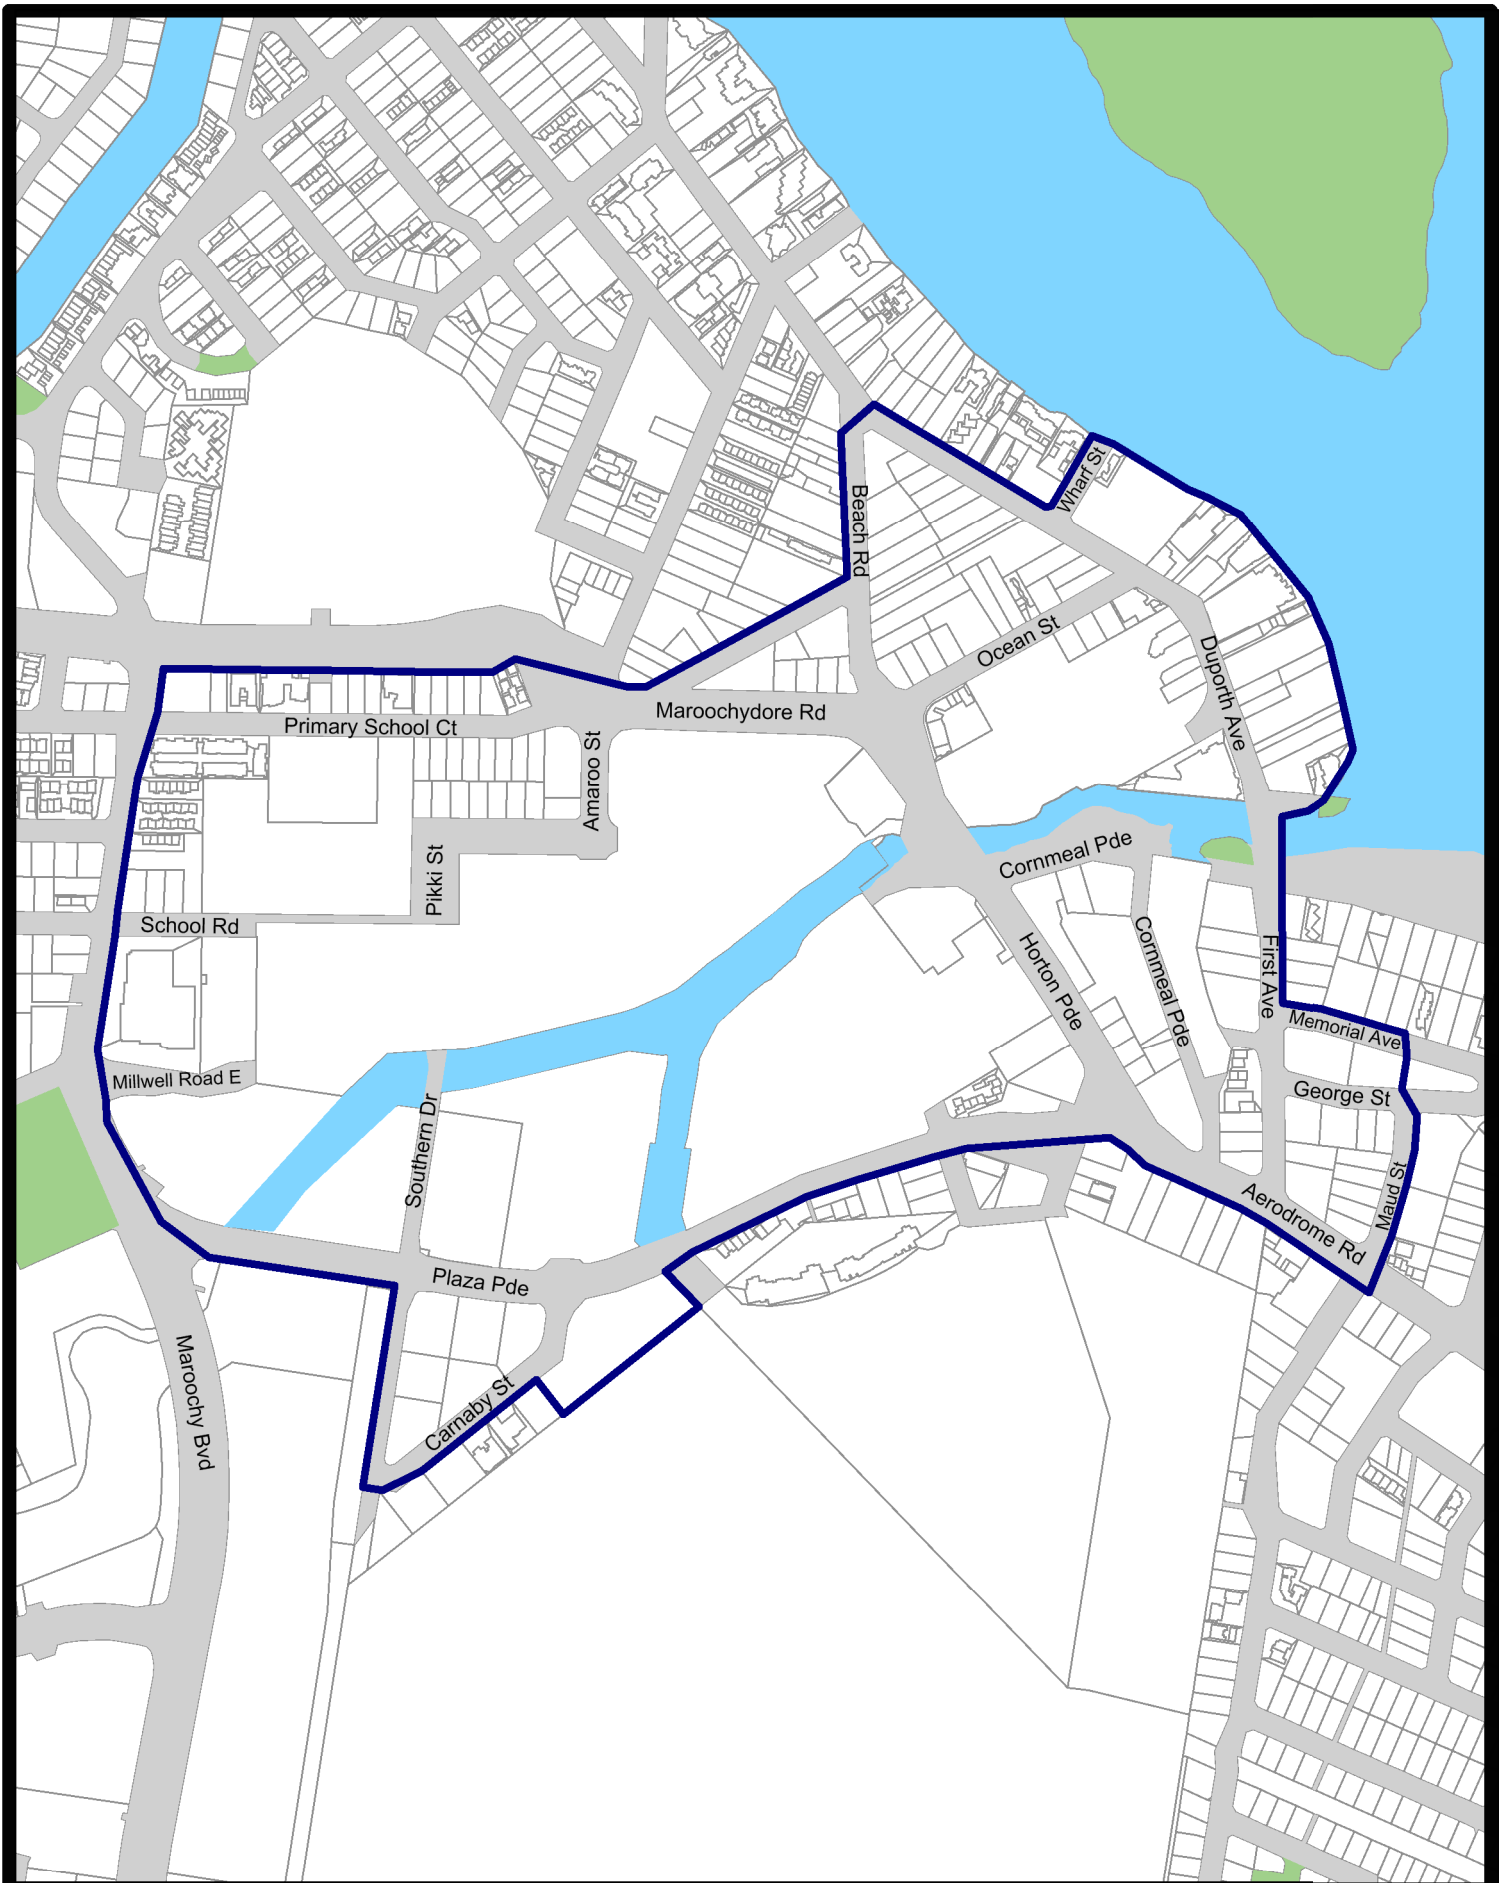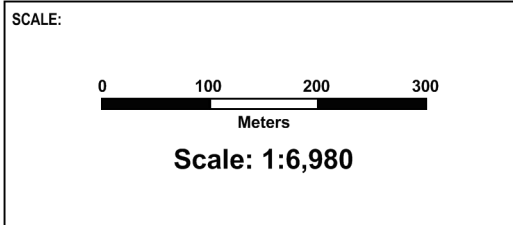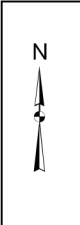

- LEGEND:
-  Boundary of safe night precinct
  -  Waterway
  -  Parks and reserves
  -  Property boundaries
  -  Road casements

# MAROOCHYDORE

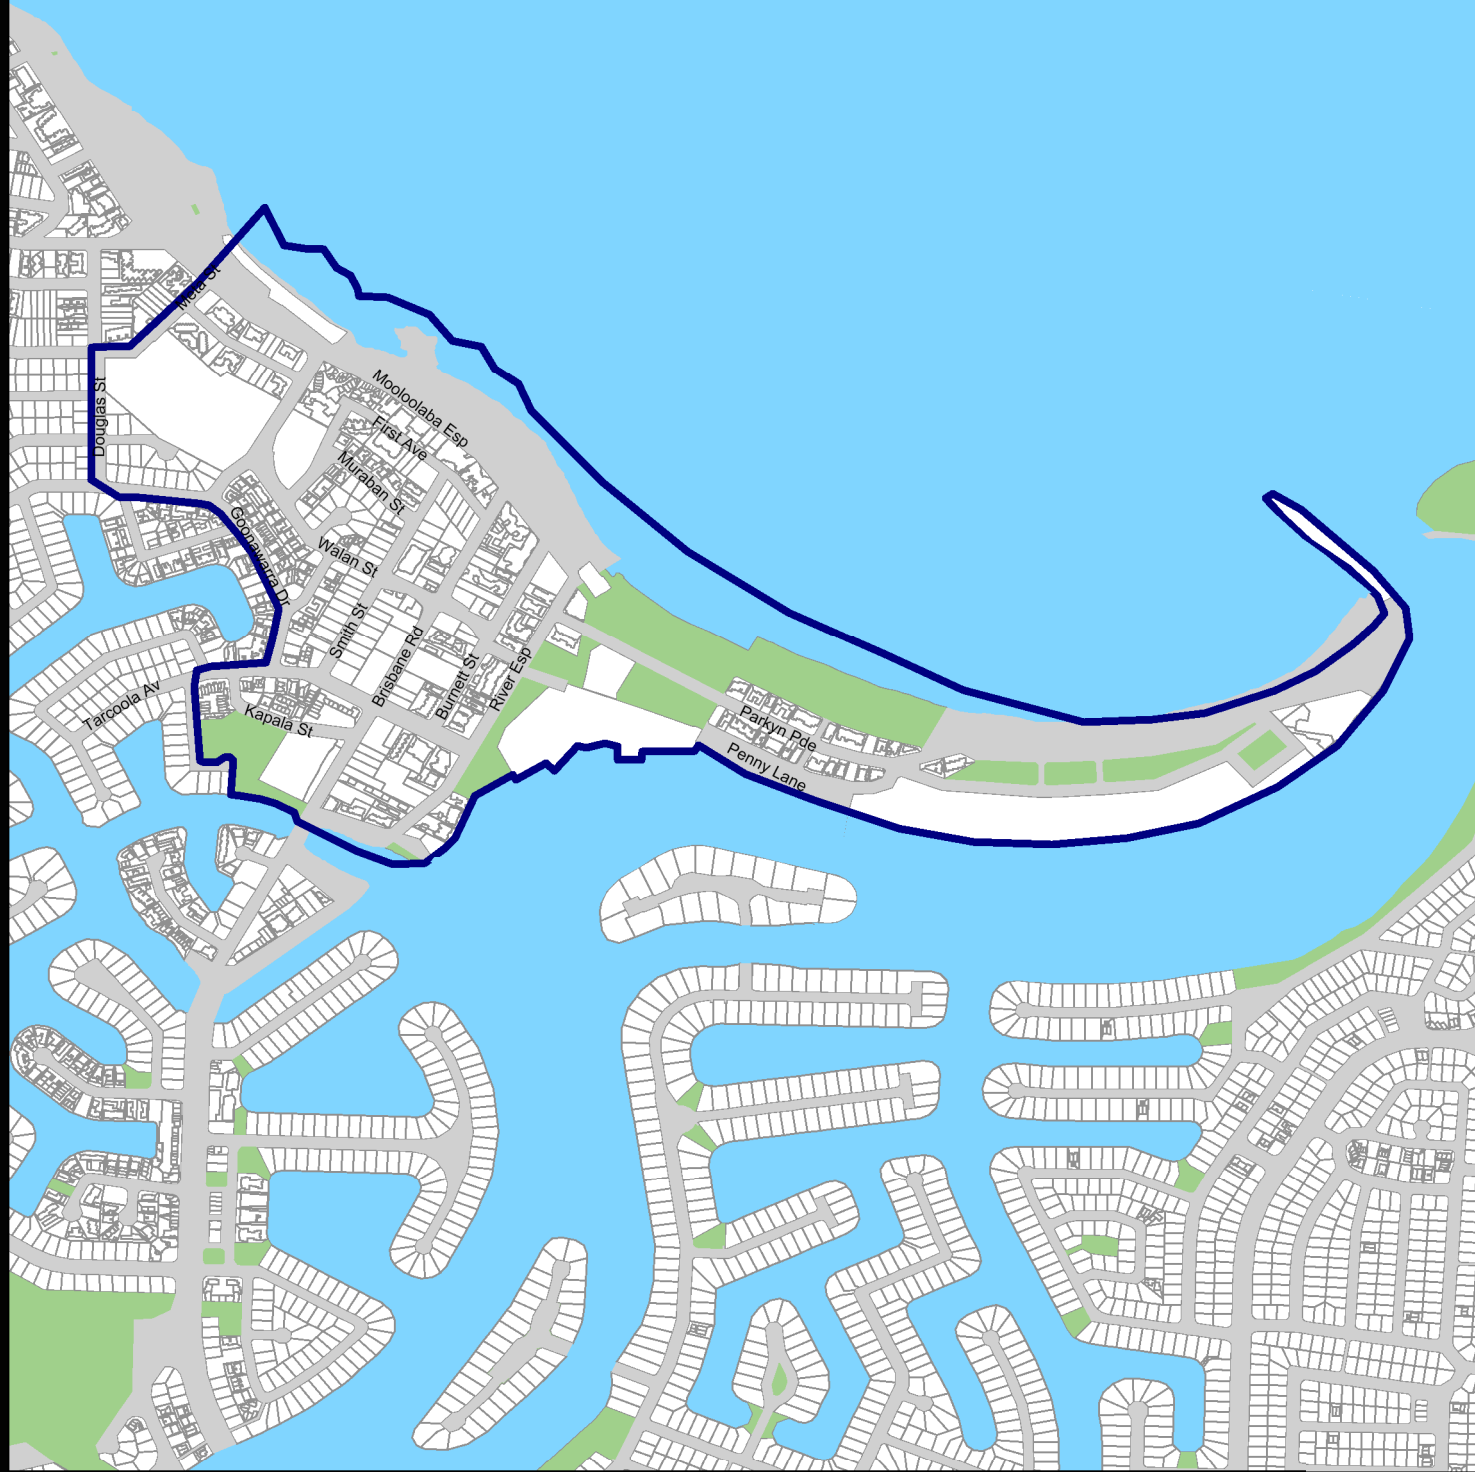

SCALE:

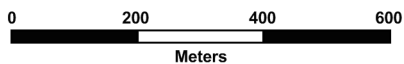

Scale: 1:11,980

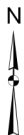

LEGEND:

-  Boundary of safe night precinct
-  Waterway
-  Parks and reserves
-  Property boundaries
-  Road casements

# MOOLOOLABA



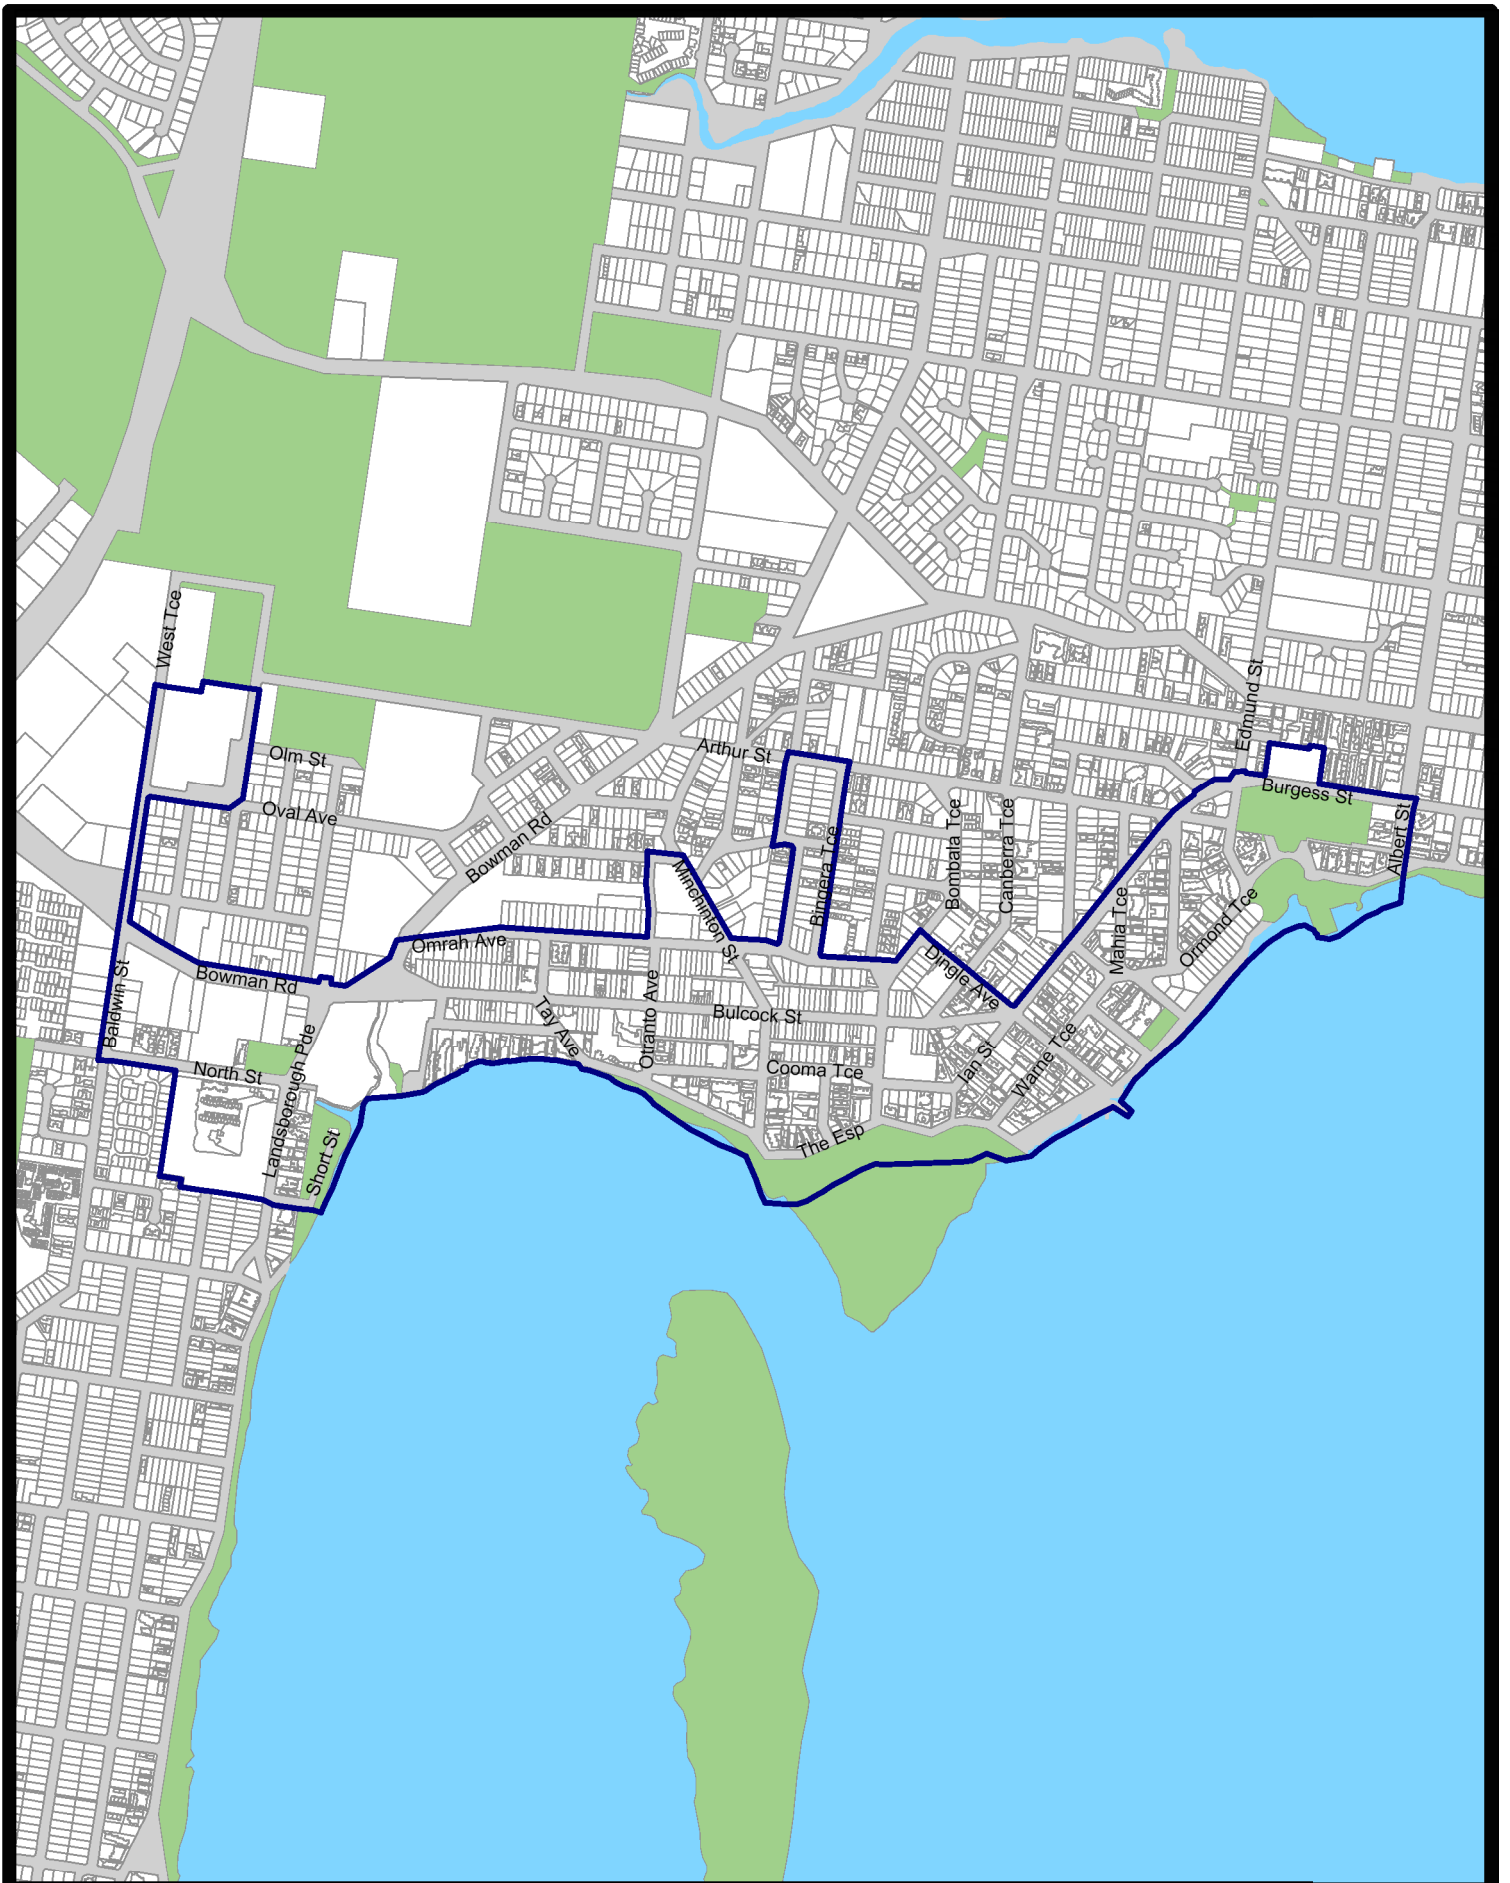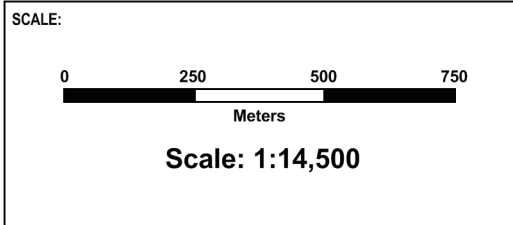

- LEGEND:
- Boundary of safe night precinct
  - Waterway
  - Parks and reserves
  - Property boundaries
  - Road casements

# CALOUNDRA
